# Supplementary material
Source: publisher figshare collection journal article supplement (https://acs.figshare.com/ndownloader/files/4474921)

# Supporting Information

## Concise Total Syntheses of Aspalathin and Nothofagin

Akop Yepremyan, Baback Salehani, and Thomas G. Minehan<sup>\*</sup>

*Department of Chemistry and Biochemistry, California State University– Northridge,  
Northridge, CA 91330*

### Table of Contents:

|                                                          |                |
|----------------------------------------------------------|----------------|
| General Methods and Procedures                           | <b>S2-S4</b>   |
| Characterization data for new compounds                  | <b>S5-S12</b>  |
| <sup>1</sup> H, <sup>13</sup> C NMR spectra of compounds | <b>S13-S40</b> |

**General Methods.** Distilled water was used in all of the experiments. Organic extracts were dried over Na<sub>2</sub>SO<sub>4</sub>, filtered, and concentrated using a rotary evaporator at aspirator pressure (20-30 mmHg). Chromatography refers to flash chromatography and was carried out on SiO<sub>2</sub> (silica gel 60, 230-400 mesh). <sup>1</sup>H and <sup>13</sup>C NMR spectra were measured in CDCl<sub>3</sub> at 400 MHz and 100 MHz, respectively, using Me<sub>4</sub>Si as internal standard. Chemical shifts are reported in ppm downfield (δ) from Me<sub>4</sub>Si.

**Representative procedure for the preparation of 1,2-di-*O*-acyl-3,4,6-tri-*O*-benzyl glucose, compounds 4a-4d.**

3,4,6-tri-*O*-acetyl-D-glucal (3 g, 11 mmol) was dissolved in CH<sub>3</sub>OH (5 mL) and KCN (36 mg, 0.5 mmol, 5 mol%) was added. The reaction was stirred for 2 hours, and another 36 mg KCN was added. After an additional two hours, TLC indicated that the reaction was complete, and the mixture was concentrated *in vacuo*. To the crude oil was added anhydrous DMF (11 mL) and the solution was cooled to 0 °C. Sodium hydride (1.76 g, 60% dispersion in mineral oil, 44 mmol) was added carefully, along with a catalytic amount (~20 mg) of imidazole; the mixture was stirred at 0 °C for 30 minutes. Then benzyl bromide (4.3 mL, 36.3 mmol) was added dropwise, followed by tetra-*n*-butylammonium iodide (405 mg, 1.1 mmol, 10 mol%), and the mixture was allowed to warm to room temperature overnight. The mixture was quenched dropwise by the careful addition of saturated NaHCO<sub>3</sub> solution (10 mL) and ether (20 mL). The phases were separated and the aqueous phase was back-extracted with ether (2 x 10 mL). The combined organic extracts were dried over Na<sub>2</sub>SO<sub>4</sub>, filtered and concentrated *in vacuo*. Purification of the residue by flash chromatography (SiO<sub>2</sub>, 10:1 Hexanes:EtOAc) afforded 3,4,6-tri-*O*-benzyl-D-glucal (3.88 g, 85%)

To a solution of 3,4,6-tri-*O*-benzyl-D-glucal (3.88 g, 9.35 mmol) in 4:1 acetone:H<sub>2</sub>O (80 mL) was added in small portions a mixture of Oxone (16.6 g, 112 mmol) and NaHCO<sub>3</sub> (4.58 g, 54 mmol) and the flask was stoppered and stirred at room temperature. After an hour, TLC (4:1 hexanes:ethyl acetate) indicated complete disappearance of starting material, and the acetone was evaporated. The remaining solid mass was partitioned between water (100 mL) and EtOAc (100 mL). The phases were separated and the aqueous phase was back-extracted with EtOAc (2 x 50 mL). The combined organic extracts were dried over Na<sub>2</sub>SO<sub>4</sub>, filtered and concentrated *in vacuo*.

The crude diol was dissolved in pyridine (100 mL) and the appropriate acyl chloride (10-30 equivalents) was added, along with a catalytic amount (~100 mg) of DMAP. The reaction was stirred at 60 °C overnight, at which time TLC indicated complete conversion to the diester. The solution was concentrated *in vacuo* and the residue was partitioned between Et<sub>2</sub>O (100 mL) and 1N HCl (100 mL). The organic layer was washed with 1N HCl (2 x 100 mL) and then with saturated aqueous NaHCO<sub>3</sub> (100 mL). The combined organic extracts were dried over Na<sub>2</sub>SO<sub>4</sub>, filtered and concentrated *in vacuo*. Purification of the residue by flash chromatography (SiO<sub>2</sub>, 85:15 Hexanes: EtOAc) afforded 1,2-di-*O*-acyl-3,4,6-tri-*O*-benzyl-D-glucal **4a-4d** (70-90% from 3,4,6-tri-*O*-benzyl-D-glucal).

### Representative procedure for C-glycosidation: Synthesis of glycosides 5a-5d.

To a stirred solution of 1,2-di-*O*-acyl-3,4,6-tri-*O*-benzyl glucose **4** (500 mg, ~0.8 mmol) in 2:1 CH<sub>2</sub>Cl<sub>2</sub>:THF (2.4 mL) was added tribenzylphloroglucinol **2a**<sup>9a</sup> (1.26 g, 3.2 mmol, 4.0 equiv). The homogeneous solution was cooled to 0°C and TMSOTf (5-10 equiv) was added. The reaction was stirred at 0 °C for one hour and then was carefully diluted with 1:1 ether/saturated NaHCO<sub>3</sub> solution (15 mL). The phases were separated and the aqueous phase was back-extracted with ether (2 x 10mL). The combined organic extracts were dried over Na<sub>2</sub>SO<sub>4</sub>, filtered and concentrated *in vacuo*. Purification of the residue by flash chromatography (SiO<sub>2</sub>) afforded glycosides **5a-5d** in the yields indicated in table 1.

### Representative procedure for formylation of 5.

To a stirred solution of **5a** (450 mg, 0.49 mmol) in DMF (3 mL) was added dropwise POCl<sub>3</sub> (277 μL, 2.94 mmol, 6 equiv) and the reaction was allowed to stir under an atmosphere of nitrogen overnight. At this time an additional portion (139 μL, 1.47 mmol, 3 equiv) of POCl<sub>3</sub> was added if TLC indicated remaining starting material. After stirring an addition four hours, the reaction mixture was carefully quenched by the addition of Et<sub>2</sub>O (10 mL) and 1N NaOH (10 mL). The phases were separated and the aqueous phase was back-extracted with ether (2 x 50 mL). The combined organic extracts were dried over Na<sub>2</sub>SO<sub>4</sub>, filtered and concentrated *in vacuo*. Purification of the residue by flash chromatography (SiO<sub>2</sub>, 85:15 Hexanes:EtOAc) afforded aldehyde **7b**.

### Representative procedure for the synthesis of alkynes 10a,b from aldehydes 9a,b.

To a 0°C solution of aldehyde **9b** (1 g, 3.14 mmol) and K<sub>2</sub>CO<sub>3</sub> (1.32 g, 9.43 mmol, 3 equiv) in CH<sub>3</sub>OH (15 mL) was added dimethyl-1-diazo-2-oxopropylphosphonate<sup>23</sup> (1.43 g, 7.1 mmol) in CH<sub>3</sub>OH (5 mL) dropwise. The reaction was allowed to warm to room temperature and was stirred overnight. The mixture was diluted with ether (50 mL) and quenched with water (50 mL); the volatiles were then removed *in vacuo* and the mixture was extracted with EtOAc (50 mL x 3). The combined organic extracts were dried over Na<sub>2</sub>SO<sub>4</sub>, filtered and concentrated *in vacuo*. Purification of the residue by flash chromatography (SiO<sub>2</sub>, 97:3 Hexanes:Ether) afforded alkyne **10b**.

### Representative procedure for alkyne addition to 7b. Synthesis of alcohols 12a,b.

Alkyne **10a** (135 mg, 0.63 mmol, 3 equiv) was dissolved in THF (1 mL) and cooled to -78 °C. A 2M solution of *n*BuLi (0.29 mL, 0.58 mmol) was added dropwise and the solution was allowed to stir for 10 minutes at -78 °C. Then a solution of aldehyde **7b** (200 mg, 0.21 mmol) was added dropwise, and the reaction was allowed to stir for an additional 10 minutes. At this time, TLC indicated complete conversion of starting material. The mixture was quenched with saturated NaHCO<sub>3</sub> solution (5 mL) and was allowed to warm to room temperature. The reaction was diluted with EtOAc (10 mL), and H<sub>2</sub>O (10 mL). The phases were separated and the aqueous phase was back-extracted with EtOAc (2 x 50 mL). The combined organic extracts were dried over Na<sub>2</sub>SO<sub>4</sub>, filtered

and concentrated *in vacuo*. Purification of the residue by flash chromatography (SiO<sub>2</sub>, 80:20 Hexanes:EtOAc) afforded alcohols **11a,b**.

To a solution of alcohols **11a,b** (230 mg, 0.20 mmol) in Et<sub>2</sub>O (1 mL) was added dropwise at room temperature a 3M solution of CH<sub>3</sub>MgBr (0.4 mL, 1.2 mmol, 6 equiv). After 10 minutes, TLC indicated ~60% conversion of starting material, and an additional 0.4 mL of 3M CH<sub>3</sub>MgBr solution was added. The reaction was then cooled to 0 °C and quenched by dropwise addition of saturated NaHCO<sub>3</sub> solution (3 mL). The mixture was diluted with EtOAc (10 mL) and H<sub>2</sub>O (10 mL); the phases were separated and the aqueous phase was back-extracted with EtOAc (2 x 50 mL). The combined organic extracts were dried over Na<sub>2</sub>SO<sub>4</sub>, filtered and concentrated *in vacuo*. Purification of the residue by flash chromatography (SiO<sub>2</sub>, 75:25 Hexanes:EtOAc) afforded alcohols **12a,b**.

#### **Representative procedure for benzylic oxidation. Synthesis of ynone 13.**

To a solution of alcohols **12a,b** (195 mg, 0.183 mmol) in 1:1 CH<sub>2</sub>Cl<sub>2</sub>: hexanes (2 mL) was added MnO<sub>2</sub> (200 mg, 2.29 mmol, 12.5 equiv). After 10 minutes at room temperature, TLC indicated complete conversion of the starting material. The mixture was diluted with Et<sub>2</sub>O (25 mL) and filtered through a pad of celite; the filter cake was washed with copious amounts of Et<sub>2</sub>O, and the filtrate was concentrated *in vacuo*. Purification of the residue by flash chromatography (SiO<sub>2</sub>, 75:25 Hexanes:EtOAc) afforded ynone **13**.

#### **Representative procedure for the hydrogenolysis of ynones 13 and 16. Synthesis of Aspalathin.**

To a solution of ynone **16** (89 mg, 0.07 mmol) in 1:1 EtOAc:CH<sub>3</sub>OH (1 mL) was added 10% palladium on carbon (~50 mg) and the mixture was stirred under an atmosphere of hydrogen (1 atm, hydrogen balloon). After 2 hours, TLC indicated complete conversion of the starting material. The mixture was diluted with 10% CH<sub>3</sub>OH/EtOAc (20 mL) and filtered through a pad of celite; the filter cake was washed with copious amounts of 10% CH<sub>3</sub>OH/EtOAc, and the filtrate was concentrated *in vacuo* to afford synthetic aspalathin.

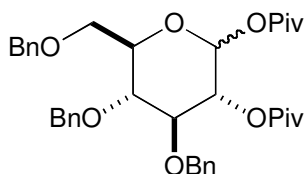

**4a**

**Purification:** SiO<sub>2</sub>(15% EtOAc in hexanes) affording **4a** (90%).

**See spectra and page S-13 and S-14**

major diastereomer ( $\beta$ ):

**<sup>1</sup>H NMR:** (400 MHz, CDCl<sub>3</sub>):

7.43-7.25 (m, 15H); 5.79 (d,  $J$ =8.0 Hz, 1H); 5.38 (t,  $J$ =8.4 Hz, 1H); 4.92 (d,  $J$ =11.2 Hz, 1H); 4.88 (d,  $J$ =10.8 Hz, 1H); 4.83 (d,  $J$ =11.2 Hz, 1H); 4.66 (t,  $J$ =12.4 Hz, 2H); 4.63 (d,  $J$ =12.4 Hz, 1H); 3.95-3.72 (m, 5H); 1.32 (s, 9H); 1.26 (s, 9H).

**<sup>13</sup>C NMR:** (100 MHz, CDCl<sub>3</sub>)

176.9; 176.6; 138.1; 128.5; 128.4; 128.3; 128.2; 128.1; 128.0; 127.9; 127.8; 127.7; 127.5; 127.4; 92.4; 83.2; 75.9; 75.0; 74.9; 73.5; 72.0; 68.0; 38.8; 27.3; 26.9.

**HRMS:** (ESI) Calculated for C<sub>37</sub>H<sub>46</sub>NaO<sub>8</sub> 641.3091, found  $m/z$ =641.3124 (M+Na)<sup>+</sup>

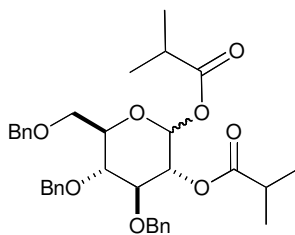

**4b**

**Purification:** SiO<sub>2</sub>(15% EtOAc in hexanes) affording **4b** (87%) as a 3:1 mixture of  $\beta$ : $\alpha$  anomers.

**See spectra and page S-15 and S-16**

**<sup>1</sup>H NMR:** (400 MHz, CDCl<sub>3</sub>):

7.45-7.10 (m, 15H); 5.76 (d,  $J$ =8.0 Hz, 1H); 5.29 (t,  $J$ =8.8 Hz, 1H); 4.89-4.55 (m, 6H); 3.93-3.67 (m, 5H); 3.57 (d,  $J$ =4.0 Hz, 1H); 2.63 (s,  $J$ =6.8 Hz, 1H); 2.50 (s,  $J$ =6.8 Hz, 1H); 1.26 (d,  $J$ =6.8 Hz, 6H); 1.19 (d,  $J$ =6.8 Hz, 6H).

**<sup>13</sup>C NMR:** (100 MHz, CDCl<sub>3</sub>)

175.4; 175.4; 138.1; 137.9; 130.5; 128.6; 128.5; 128.4; 128.3; 128.1; 128.0; 127.9; 127.8; 127.7; 127.6; 92.2; 82.9; 75.8; 75.0; 73.5; 71.9; 34.0; 33.9; 19.0; 18.8; 18.7; 18.4; 18.3.

**HRMS:** (ESI) Calculated for C<sub>35</sub>H<sub>46</sub>NO<sub>8</sub> 608.3218, found  $m/z$ =608.3227 (M+NH<sub>4</sub>)<sup>+</sup>

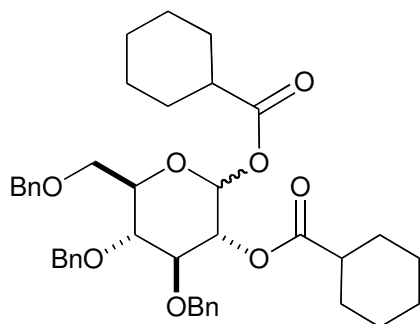

**4c**

**Purification:** SiO<sub>2</sub>(15% EtOAc in hexanes) affording **4c** (70%) as a 3:1 mixture of β:α anomers.

**See spectra and page S-17 and S-18**

**<sup>1</sup>H NMR:** (400 MHz, CDCl<sub>3</sub>):

7.27-7.06 (m, 15H); 5.59 (d, *J*=8.4 Hz, 1H); 5.11 (t, *J*=8.4 Hz, 1H); 4.74-4.41 (m, 6H); 3.77-3.52 (m, 5H); 2.52 (tt, *J*=3.6, 11.2 Hz, 2H); 1.90-1.11 (m, 20H).

**<sup>13</sup>C NMR:** (100 MHz, CDCl<sub>3</sub>)

182.6; 174.4; 174.3; 173.7; 138.3; 138.0; 137.9; 137.8; 128.4; 128.3; 128.2; 128.1; 127.9; 127.8; 127.7; 127.6; 92.1; 82.8; 76.8; 75.0; 73.4; 43.2; 42.9; 29.1; 28.8; 28.7; 28.6; 28.4; 25.7; 25.6; 25.4; 25.3; 25.2.

**HRMS:** (ESI) Calculated for C<sub>41</sub>H<sub>50</sub>NaO<sub>8</sub> 693.3398, found *m/z*=693.3406 (M+Na)<sup>+</sup>

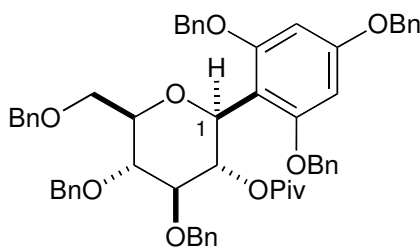

**5a**

**Purification:** SiO<sub>2</sub>(18% EtOAc in hexanes) affording **5a** (55%).

**See spectra pages S19 and S20**

**<sup>1</sup>H NMR:** (400 MHz, CDCl<sub>3</sub>)

7.53-7.10 (m, 30H); 6.22 (d, *J*=2.0 Hz, 1H); 6.15 (d, *J*=2.0 Hz, 1H); 5.98 (t, *J*=9.2 Hz, 1H); 5.07-4.42 (m, 12H); 3.72-3.65 (m, 5H); 0.85 (s, 9H)

**<sup>13</sup>C NMR:** (100 MHz, CDCl<sub>3</sub>)

176.7; 160.6; 158.7; 138.7; 138.5; 138.4; 137.4; 137.0; 136.8; 128.6; 128.5; 128.4; 128.3; 128.2; 128.0; 127.9; 127.8; 127.6; 127.4; 127.3; 127.2; 106.5; 104.4; 78.0; 76.9; 76.7; 74.9; 73.4; 72.2; 70.6; 70.0; 38.6; 26.9

**HRMS:** (ESI) Calculated for C<sub>59</sub>H<sub>60</sub>NaO<sub>9</sub> 935.4135, found *m/z*= 935.4867 (M+Na)<sup>+</sup>

**<sup>1</sup>D:** -8.9° (*c* 0.02, CH<sub>2</sub>Cl<sub>2</sub>)

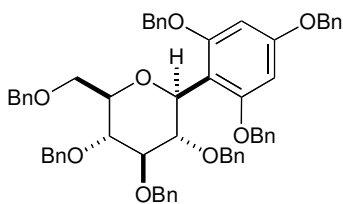

**3a**

**Purification:** SiO<sub>2</sub>(10% EtOAc in hexanes) affording **3a** (89%) as a 3:1 (β:α) mixture of diastereomers.

**See spectra pages S21 and S22**

Major diastereomer:

**<sup>1</sup>H NMR:** (400 MHz, CDCl<sub>3</sub>)

7.69-7.12 (m, 35H); 6.45 (s, 2H); 5.28-5.02 (m, 9H); 4.83-4.66 (m, 5H); 4.62 (t, *J*=9.2 Hz, 1H); 4.39 (d, *J*=11.2 Hz, 1H); 3.99-3.90 (m, 4H); 3.77 (m, 1H).

**<sup>13</sup>C NMR:** (100 MHz, CDCl<sub>3</sub>)

160.5; 160.2; 160.1; 159.4; 139.3; 139.0; 138.7; 138.6; 137.4; 137.3; 136.9; 129.3; 128.9; 128.8; 128.7; 128.5; 128.4; 128.2; 128.1; 128.0; 127.9; 127.8; 127.7; 127.6; 127.4; 127.3; 127.2; 109.5; 109.4; 94.9; 94.3; 87.8; 79.9; 79.6; 78.5; 76.8; 75.5; 75.2; 74.2; 73.6; 73.5; 71.4; 70.8; 70.2; 69.6.

**HRMS:** (ESI) Calculated for C<sub>61</sub>H<sub>58</sub>NaO<sub>8</sub> 941.4029, found *m/z*= 941.5475 (M+Na)<sup>+</sup>

**[α]<sub>D</sub><sup>25</sup>:** -19.8° (*c* 0.02, CH<sub>2</sub>Cl<sub>2</sub>)

Previous Preparation: Schmidt, R. R.; Effenberger, G. *Carbohydr. Res.* **1987**, 171, 59.

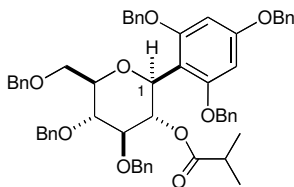

**5b**

**Purification:** SiO<sub>2</sub>(18% EtOAc in hexanes) affording **5b** (65%)

**See spectra pages S23 and S24**

**<sup>1</sup>H NMR:** (400 MHz, CDCl<sub>3</sub>)

7.65-7.21 (m, 30H); 6.35 (d, *J*=2.0 Hz, 1H); 6.27 (d, *J*=2.0 Hz, 1H); 6.09 (t, *J*=9.2 Hz, 1H); 5.19-4.55 (m, 7H); 4.15 (d, *J*=6.8 Hz, 1H); 3.87-3.63 (m, 4H); 2.31 (st, *J*=6.8 Hz, 1H); 0.96 (d, *J*=6.8 Hz, 3H); 0.86 (d, *J*=7.2 Hz, 3H).

**<sup>13</sup>C NMR:** (100 MHz, CDCl<sub>3</sub>)

175.5; 160.5; 158.7; 138.8; 138.5; 137.4; 137.1; 136.8; 128.6; 128.5; 128.4; 128.3; 128.1; 128.0; 127.9; 127.7; 127.6; 127.5; 127.4; 127.3; 127.2; 127.1; 106.6; 94.0; 93.0; 85.4; 79.7; 78.0; 75.0; 74.3; 73.4; 72.2; 71.3; 70.7; 70.6; 70.0; 34.1; 18.9; 18.5.

**HRMS:** (ESI) Calculated for C<sub>58</sub>H<sub>58</sub>NaO<sub>9</sub> 921.3973, found *m/z*= 921.3961 (M+Na)<sup>+</sup>

**[α]<sub>D</sub><sup>25</sup>:** +13.4° (*c* 0.004, CH<sub>2</sub>Cl<sub>2</sub>)

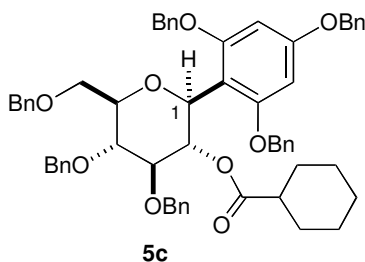

**Purification:** SiO<sub>2</sub> (13% EtOAc in hexanes) affording **5c** (30%)

**See spectra pages S25 and S26**

**<sup>1</sup>H NMR:** (400 MHz, CDCl<sub>3</sub>)

7.61-7.21 (m, 30H); 6.30 (d, *J*=2.0 Hz, 1H); 6.23 (d, *J*=2.0 Hz, 1H); 6.04 (t, *J*=10.0 Hz, 1H); 5.17 (s, 1H); 5.06-4.51 (m, 12H); 3.84-3.59 (m, 5H); 2.00 (td, *J*=7.6, 3.2 Hz, 1H); 1.62-1.09 (m, 10H).

**<sup>13</sup>C NMR:** (100 MHz, CDCl<sub>3</sub>)

174.4; 160.5; 158.7; 138.8; 138.5; 138.4; 137.4; 137.1; 136.8; 128.6; 128.4; 128.3; 128.2; 128.1; 128.0; 127.9; 127.8; 127.6; 127.5; 127.4; 127.3; 127.2; 127.1; 106.6; 79.6; 78.0; 76.9; 76.7; 76.6; 74.3; 71.1; 70.7; 43.3; 28.8; 28.4; 25.7; 25.4; 25.2

**HRMS:** (ESI) Calculated for C<sub>61</sub>H<sub>62</sub>NaO<sub>9</sub> 961.4268, found *m/z*= 961.4292 (M+Na)<sup>+</sup>

**[α]<sub>D</sub><sup>25</sup>:** -4.25° (c 0.03, CH<sub>2</sub>Cl<sub>2</sub>)

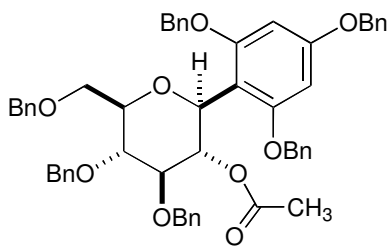

**Purification:** SiO<sub>2</sub> (15% EtOAc in hexanes) affording **5d** (43%)

**See spectra pages S27 and S28**

**<sup>1</sup>H NMR:** (400 MHz, CDCl<sub>3</sub>)

7.62-7.21 (m, 30H); 6.32 (d, *J*=2.0 Hz, 1H); 6.24 (d, *J*=2.0 Hz, 1H); 6.01 (t, *J*=9.6 Hz, 1H); 5.17-4.54 (m, 13H); 3.84-3.73 (m, 4H); 3.62 (dt, *J*=8.4, 2.0 Hz, 1H); 1.73 (s, 3H).

**<sup>13</sup>C NMR:** (100 MHz, CDCl<sub>3</sub>)

169.4; 160.5; 158.7; 138.8; 138.5; 138.4; 138.3; 137.4; 137.2; 136.7; 129.4; 129.0; 128.6; 128.5; 128.4; 128.3; 128.2; 128.1; 128.0; 127.9; 127.8; 127.7; 127.6; 127.4; 127.3; 127.0; 120.3; 107.4; 106.8; 85.2; 79.6; 78.1; 76.7; 75.0; 74.3; 73.4; 72.2; 71.8; 70.6; 70.0; 20.7.

**HRMS:** (ESI) Calculated for C<sub>56</sub>H<sub>54</sub>NaO<sub>9</sub> 893.3659, found *m/z*=893.3656 (M+Na)<sup>+</sup>

**[α]<sub>D</sub><sup>25</sup>:** -8.3 (c 0.01, CH<sub>2</sub>Cl<sub>2</sub>)



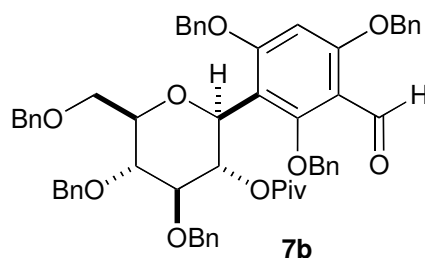

**Purification:** SiO<sub>2</sub>(20% EtOAc in hexanes) affording **7a** (85%).

**See spectra on pages S-29 and S-30**

**<sup>1</sup>H NMR:** (400 MHz, CDCl<sub>3</sub>)

10.65 (s, 1H); 7.78-7.32 (m, 30H); 6.60 (s, 1H); 6.19 (t, *J*=9.6 Hz, 1H); 5.42-4.65 (m, 12H); 3.93-3.53 (m, 5H); 1.11 (s, 9H).

**<sup>13</sup>C NMR:** (100 MHz, CDCl<sub>3</sub>)

187.3; 177.1; 165.2; 163.6; 162.0; 138.7; 138.4; 138.3; 136.9; 136.2; 135.9; 129.3; 129.1; 128.9; 128.7; 128.6; 128.5; 128.4; 128.2; 128.1; 128.0; 127.8; 127.6; 127.5; 127.4; 127.3; 127.2; 127.1; 126.9; 112.6; 112.2; 94.8; 85.4; 79.7; 78.8; 76.9; 75.1; 74.6; 73.5; 72.8; 71.1; 71.0; 70.9; 38.7; 27.1.

**HRMS:** (ESI) Calculated for C<sub>60</sub>H<sub>60</sub>NaO<sub>10</sub> 963.4079, found *m/z*=963.4077 (M+Na)<sup>+</sup>

**[α]<sub>D</sub><sup>25</sup>:** -8.6° (*c* 0.23, CH<sub>2</sub>Cl<sub>2</sub>)

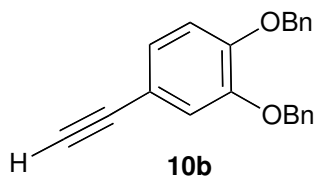

**Purification:** SiO<sub>2</sub>(5% EtOAc in hexanes) affording **10b** (68%)

**See spectra on pages S-31 and S-32**

**<sup>1</sup>H NMR:** (400 MHz, CDCl<sub>3</sub>)

7.47-7.26 (m, 11H); 7.09 (d, *J*=8.4 Hz, 1H); 6.88 (d, *J*=8.4 Hz, 1H); 5.18 (s, 2H); 5.15 (s, 2H); 2.99 (s, 1H)

**<sup>13</sup>C NMR:** (100 MHz, CDCl<sub>3</sub>)

149.8; 148.5; 136.9; 128.5; 127.9; 127.3; 127.2; 126.1; 118.3; 114.8; 114.5; 83.6; 75.8; 71.3; 71.0

**HRMS:** (ESI) Calculated for C<sub>22</sub>H<sub>19</sub>O<sub>2</sub> 315.1379, found *m/z*= 315.1382 (M+H)<sup>+</sup>

**m.p.:** 83.7°C-87.3°C

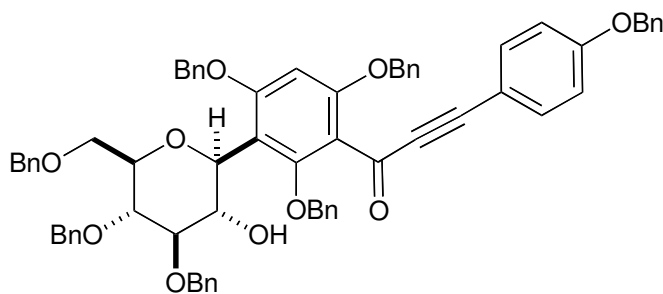

**13**

**Purification:** SiO<sub>2</sub>(20% EtOAc in hexanes) affording **13** (75%)

**See spectra on pages S-33 and S-34**

**<sup>1</sup>H NMR:** (400 MHz, CDCl<sub>3</sub>)

7.57-7.25 (m, 37H); 6.99 (d, *J*=8.8 Hz, 2H); 6.52 (s, 1H); 5.49 (d, *J*=10.4 Hz, 1H); 5.23-4.56 (m, 14H); 3.90-3.57 (m, 6H); 1.96 (s, 1H).

**<sup>13</sup>C NMR:** (100 MHz, CDCl<sub>3</sub>)

178.0; 161.6; 160.6; 158.7; 139.1; 138.9; 138.3; 136.5; 136.3; 135.1; 128.7; 128.6; 128.5; 128.4; 128.3; 128.2; 128.1; 128.0; 127.9; 127.8; 127.7; 127.6; 127.5; 127.4; 127.3; 127.2; 127.1; 127.0; 118.5; 115.1; 113.2; 112.7; 91.9; 90.7; 87.6; 76.9; 76.8; 75.0; 74.9; 70.8; 70.1.

**HRMS:** (ESI) Calculated for C<sub>74</sub>H<sub>67</sub>O<sub>11</sub> 1131.4678, found *m/z*= 1131.5032 (M-H)<sup>+</sup>

**[α]<sub>D</sub><sup>25</sup>:** -20.9° (*c* 0.01, CH<sub>2</sub>Cl<sub>2</sub>)

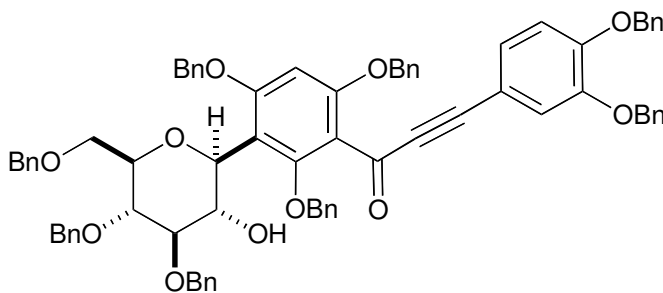

**16**

**Purification:** SiO<sub>2</sub>(20% EtOAc in hexanes) affording **16** (66%)

**See spectra on pages S-35 and S-36**

**<sup>1</sup>H NMR:** (400 MHz, CDCl<sub>3</sub>)

7.51-7.20 (m, 41H); 7.11 (d, *J*=7.2 Hz, 1H); 6.89 (d, *J*=8.8 Hz, 1H); 6.44 (s, 1H); 5.38 (d, *J*=10.0 Hz, 1H); 5.21-4.47 (m, 16H); 3.81-3.50 (m, 6H); 1.83 (s, 1H)

**<sup>13</sup>C NMR:** (100 MHz, CDCl<sub>3</sub>)

177.4; 161.4; 158.7; 151.2; 148.5; 138.8; 138.3; 138.2; 136.9; 136.7; 136.6; 136.4; 136.3; 129.6; 129.3; 129.2; 128.9; 128.7; 128.6; 128.5; 128.4; 128.1; 128.0; 127.9; 127.8; 127.7; 127.6; 127.5; 127.3; 127.2; 127.0; 126.9; 126.8; 126.5; 118.7; 118.4; 114.9; 114.1; 113.1; 113.0; 91.8; 90.3; 87.5; 79.2; 76.6; 76.5; 76.4; 75.0; 74.9; 73.5; 71.1; 70.9; 70.8; 70.7.

**HRMS:** (ESI) Calculated for C<sub>77</sub>H<sub>68</sub>O<sub>11</sub>Na 1191.4654, found *m/z*= 1191.4636 (M+Na)<sup>+</sup>

$[\alpha]_D^{25}$ : +6.12° (c 0.005, CH<sub>2</sub>Cl<sub>2</sub>)

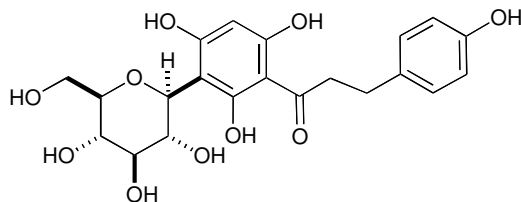

synthetic nothofagin

**Purification:** filtration through celite and concentration *in vacuo* gave **synthetic nothofagin (B)** (89%)

**See spectra on pages S-37 and S-38**

**<sup>1</sup>H NMR:** (400 MHz, CDCl<sub>3</sub>)

7.01 (d, *J*=8.4 Hz, 2H); 6.65 (d, *J*=8.0 Hz, 2H); 5.93 (s, 1H); 4.52 (d, *J*=10.0 Hz, 1H); 3.88 (t, *J*=8.8 Hz, 1H); 3.64 (d, *J*=11.2 Hz, 1H); 3.42 (d, *J*=11.2 Hz, 1H); 3.24 (t, *J*=8.0 Hz, 2H); 3.16 (m, 2H); 2.77 (t, *J*=7.6 Hz, 2H).

**<sup>13</sup>C NMR:** (100 MHz, CDCl<sub>3</sub>)

204.8; 165.3; 164.2; 162.3; 155.8; 132.0; 129.1; 115.4; 104.4; 104.1; 95.3; 95.0; 94.3; 74.8; 73.3; 71.2; 70.3; 61.6; 46.0; 30.0.

**HRMS:** (ESI) Calculated for C<sub>21</sub>H<sub>25</sub>O<sub>10</sub> 437.1442, found *m/z*= 437.1444 (M+H)<sup>+</sup>

$[\alpha]_D^{25}$ : +36.6° (c 0.01, EtOH)

**m.p.** 92-110°C (decomp)(lit. 70-100°C)

**UV:** λ<sub>max</sub>=288 (ε=14,000)(lit. λ<sub>max</sub>=287.5)

**IR:** 3341 cm<sup>-1</sup>, 2925, 1627, 1515, 1541, 1367, 1245, 1171, 1080, 1018, 911, 828.

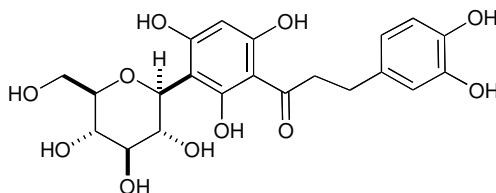

synthetic aspalathin

**Purification:** filtration through celite and concentration *in vacuo* gave **synthetic aspalathin A** (77%)

**See spectra on pages S-39 and S-40**

**<sup>1</sup>H NMR:** (400 MHz, CDCl<sub>3</sub>)

6.63 (d, *J*=7.6 Hz, 1H); 6.61 (s, 1H); 6.47 (d, *J*=8.0 Hz, 1H); 5.93 (s, 1H); 4.54 (d, *J*=9.6 Hz, 1H); 3.87 (t, *J*=8.4 Hz, 1H); 3.66 (d, *J*=11.2 Hz, 1H); 3.42 (d, *J*=8.8 Hz, 1H); 3.21 (t, *J*=7.6 Hz, 2H); 3.14 (m, 3H) 2.70 (t, *J*=7.6 Hz, 2H).

**<sup>13</sup>C NMR:** (100 MHz, CDCl<sub>3</sub>)

204.9; 165.5; 164.4; 162.2; 145.5; 143.8; 133.0; 119.3; 116.2; 115.9; 104.4; 104.1; 95.0; 81.7; 79.4; 74.1; 70.8; 70.5; 61.7; 45.8; 30.2

**HRMS:** (ESI) Calculated for C<sub>21</sub>H<sub>25</sub>O<sub>11</sub> 453.1391, found *m/z*= 453.1383 (M+H)<sup>+</sup>

$[\alpha]_D^{25}$ : +33.3° (c 0.001, EtOH) (lit. +34.7° (EtOH))

**m.p.** 131-165°C (lit. 140-160°C)

**IR:** 3368 cm<sup>-1</sup>, 2925, 1626, 1527, 1454, 1372, 1283, 1115, 1080, 1041, 591.

**UV:** λ<sub>max</sub>=289 (ε=10,000) (lit. λ<sub>max</sub>=287.5)



CDCl<sub>3</sub>, 400MHz

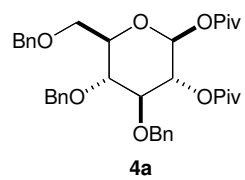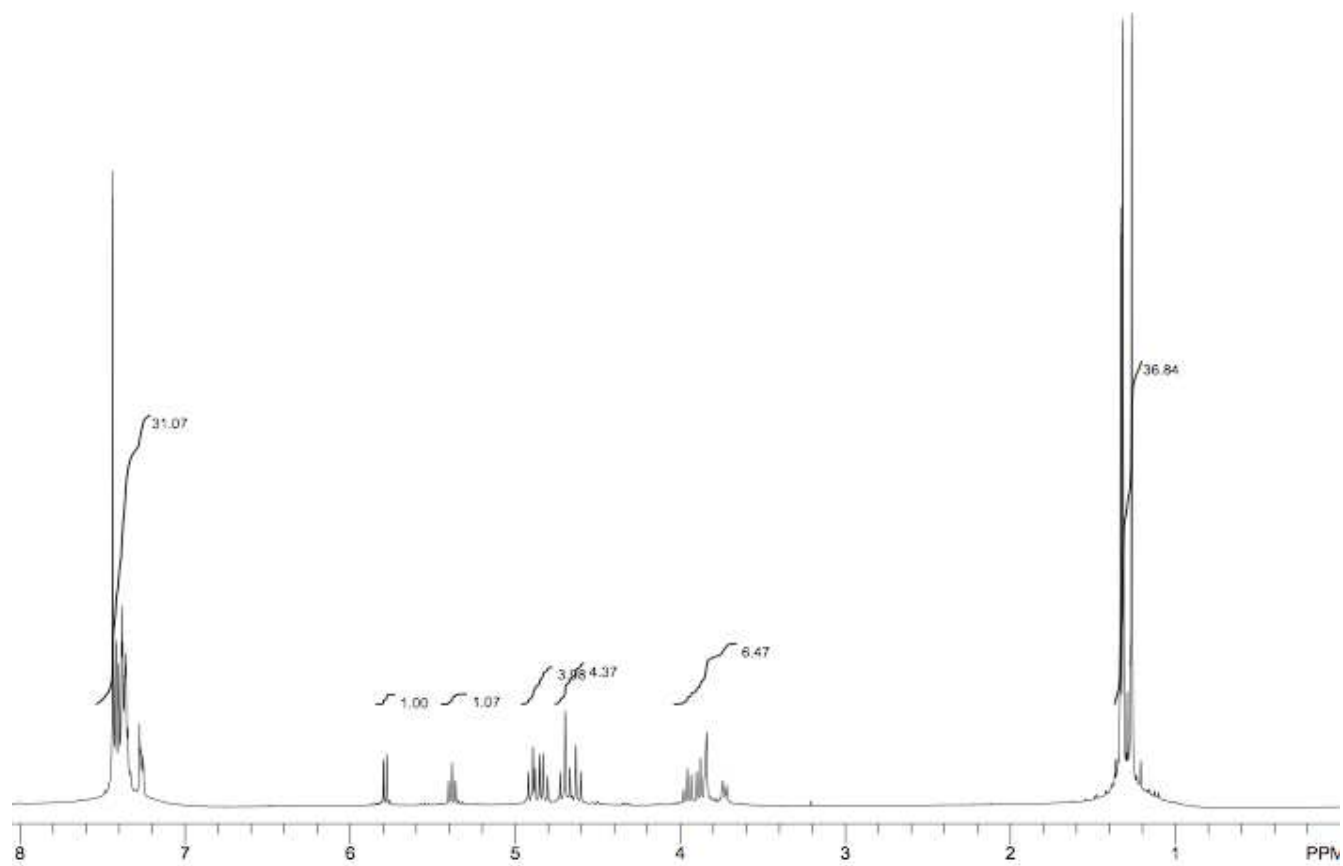

CDCl<sub>3</sub>, 100MHz

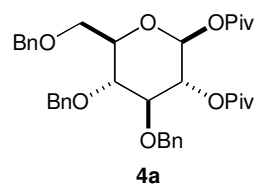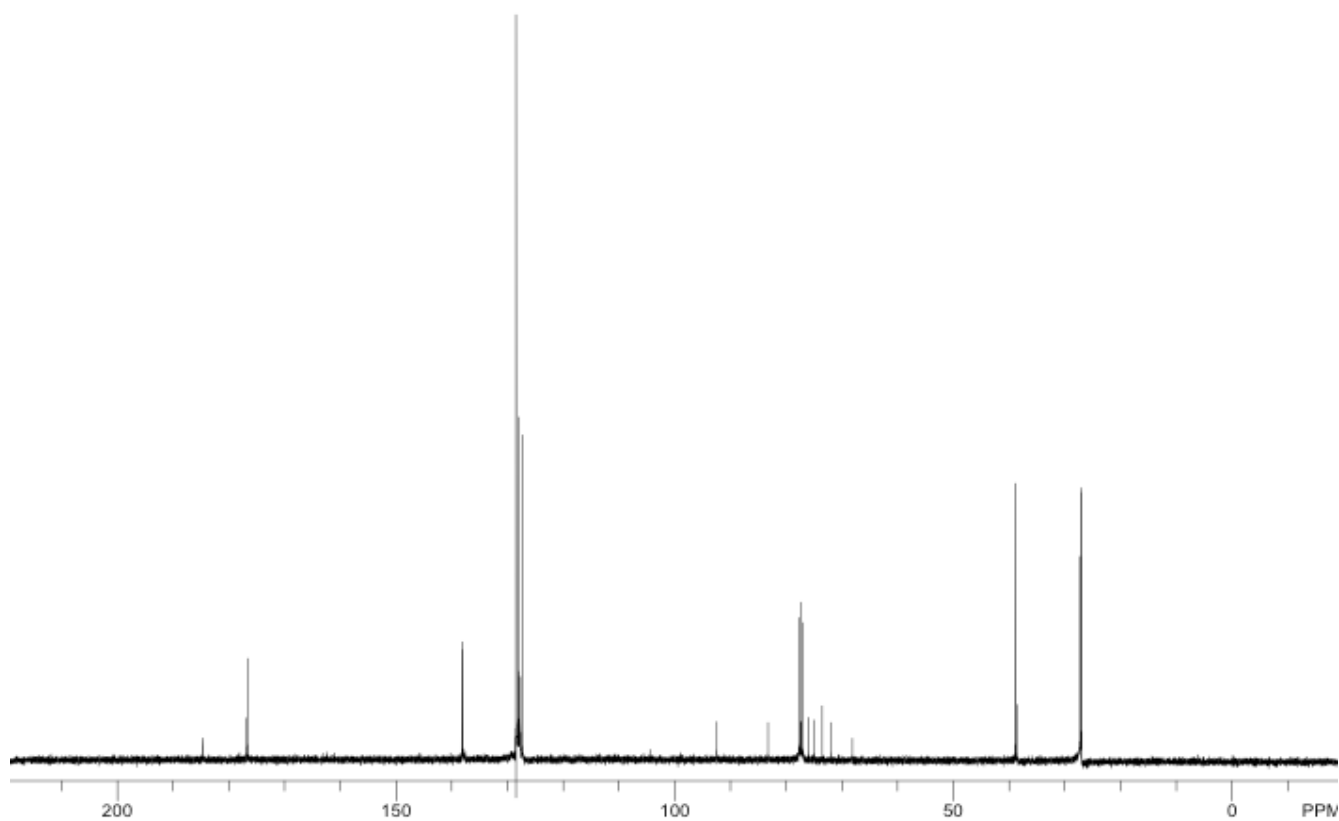

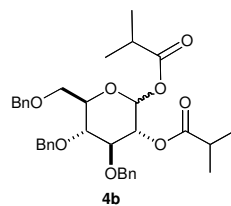

CDCl<sub>3</sub>, 400MHz

(as a 3:1 mixture of  $\beta$ : $\alpha$  anomers)

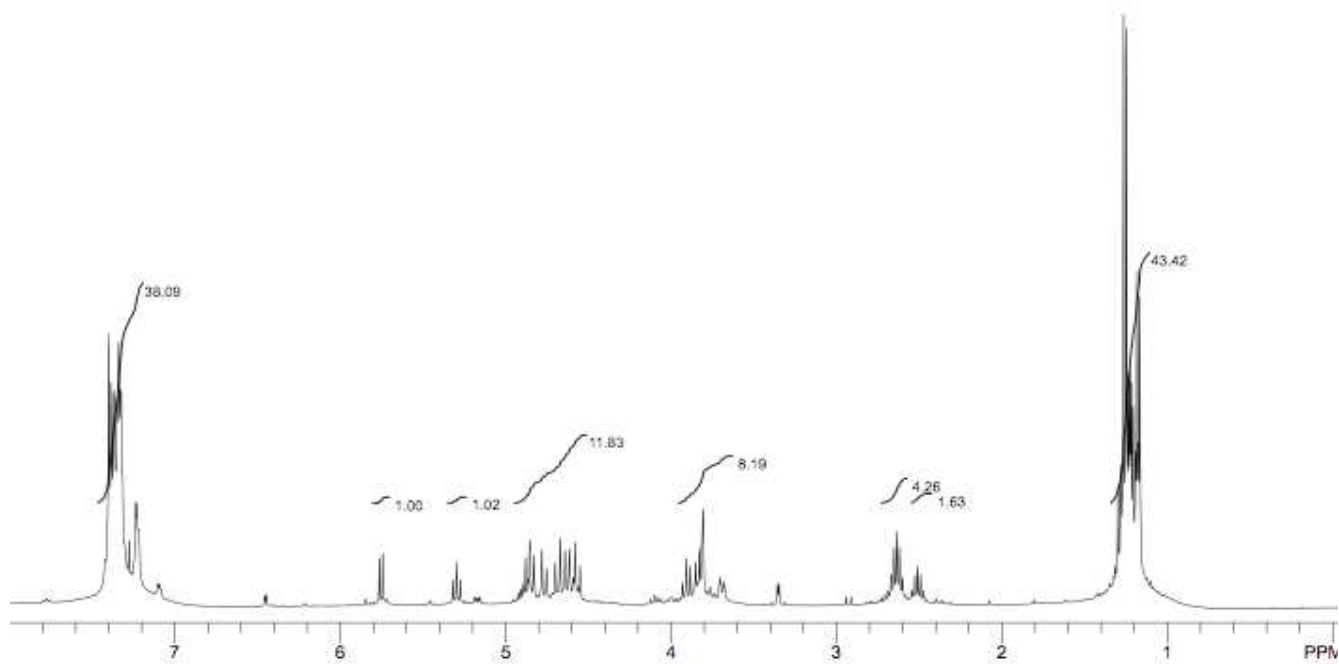

CDCl<sub>3</sub>, 100MHz

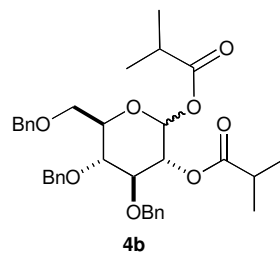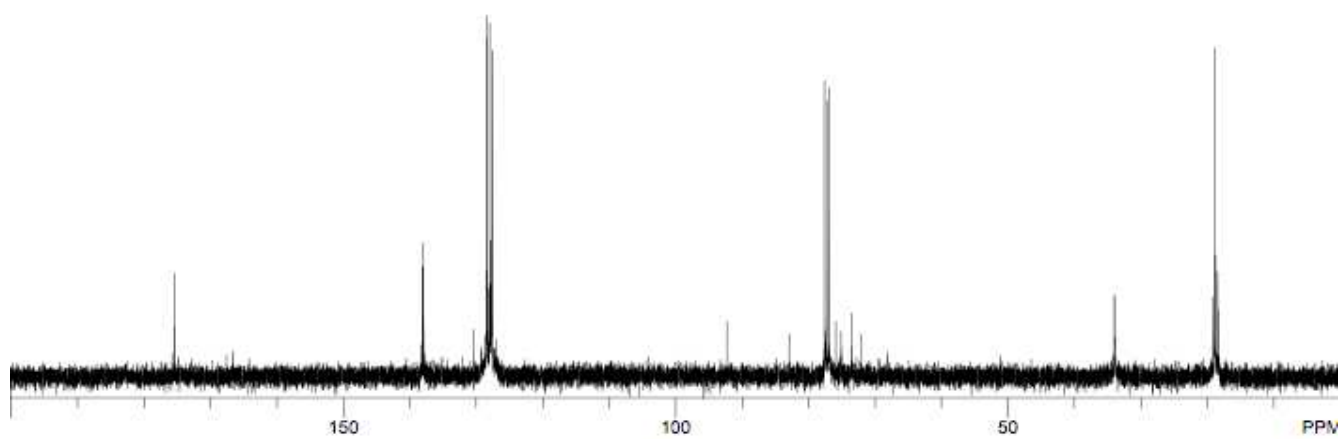



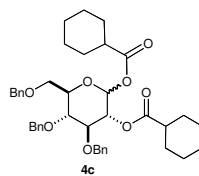

CDCl<sub>3</sub>, 400MHz

(as a 3:1 mixture of  $\beta$ : $\alpha$  anomers)

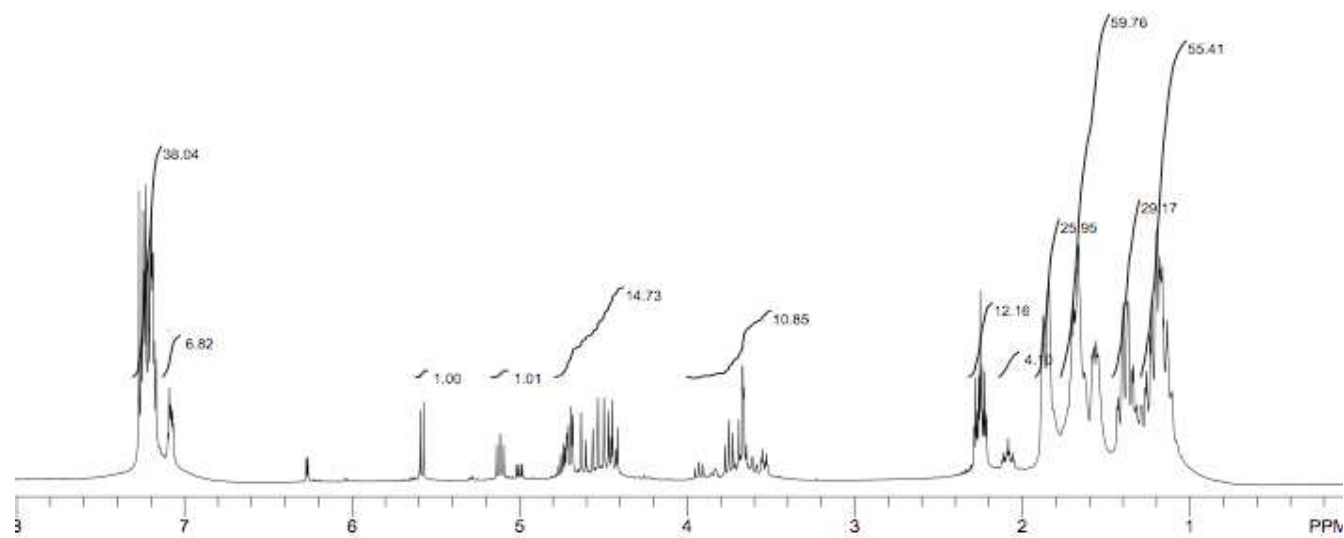

CDCl<sub>3</sub>, 100MHz

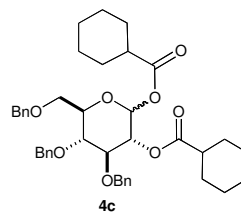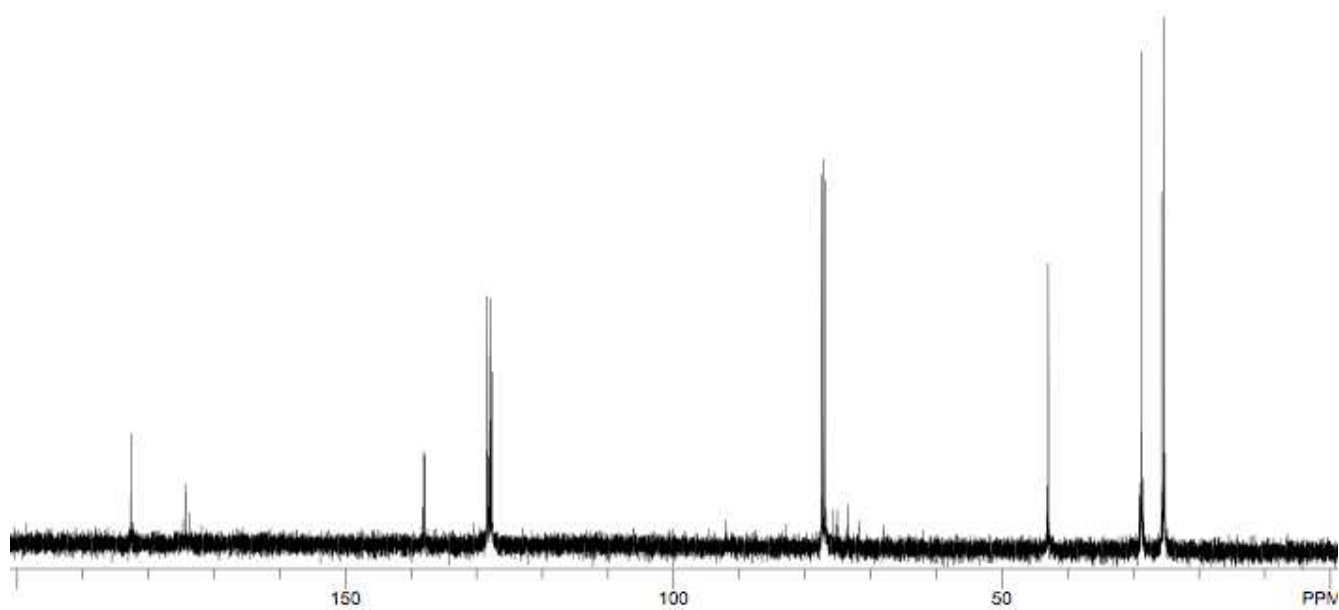

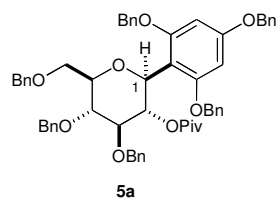

CDCl<sub>3</sub>, 400MHz

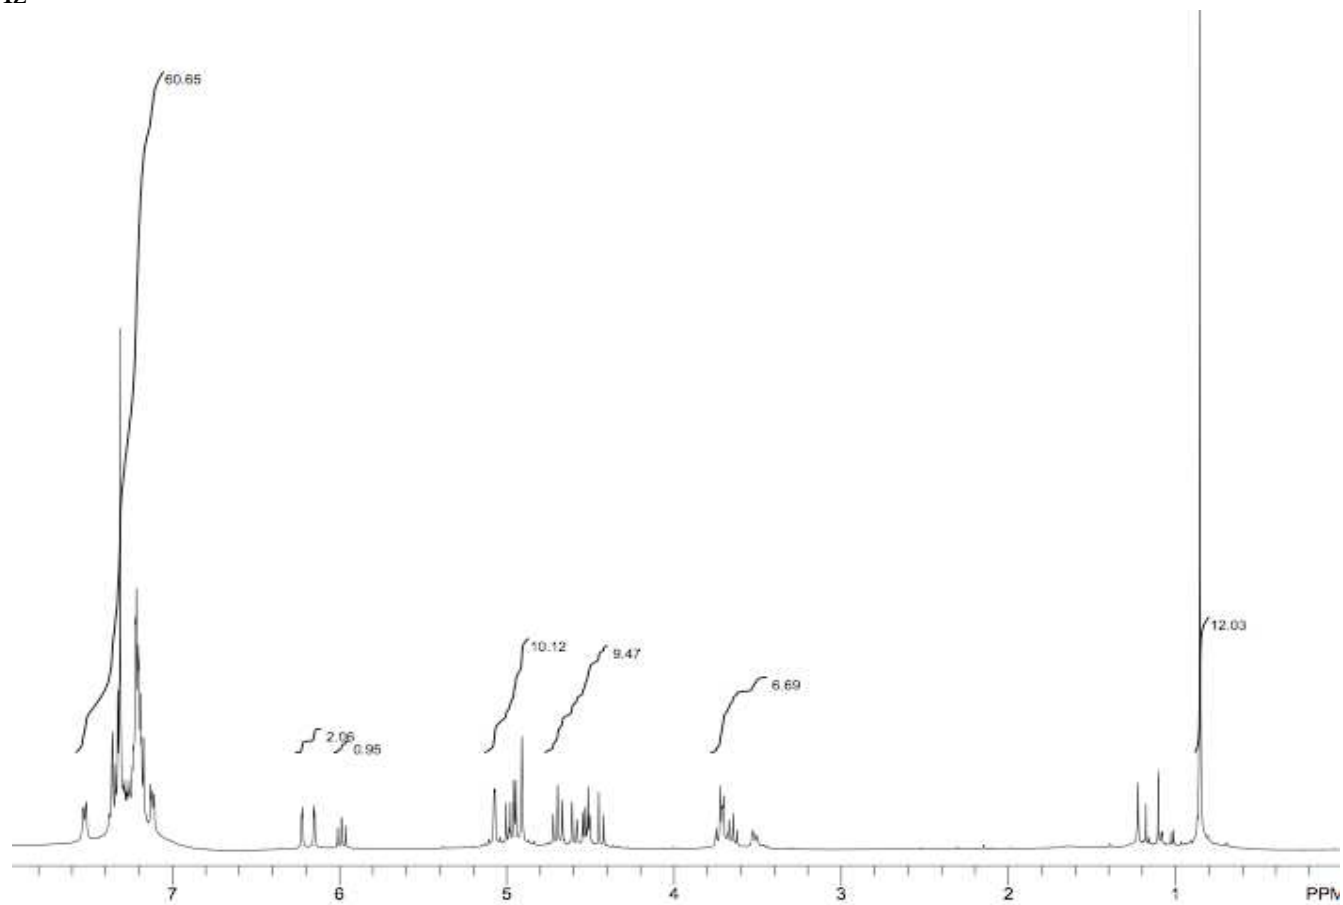

CDCl<sub>3</sub>, 100MHz

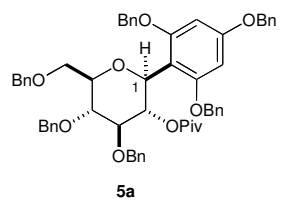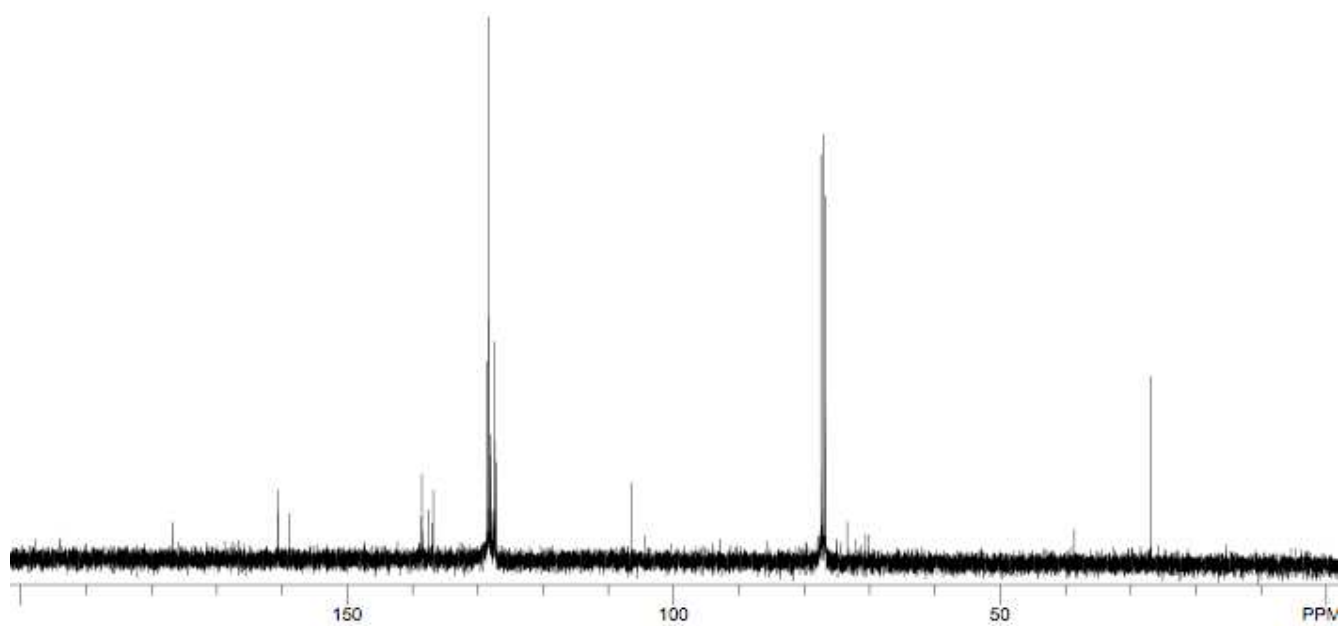

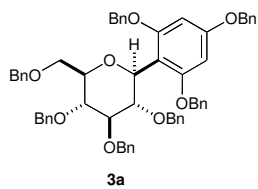

CDCl<sub>3</sub>, 400MHz

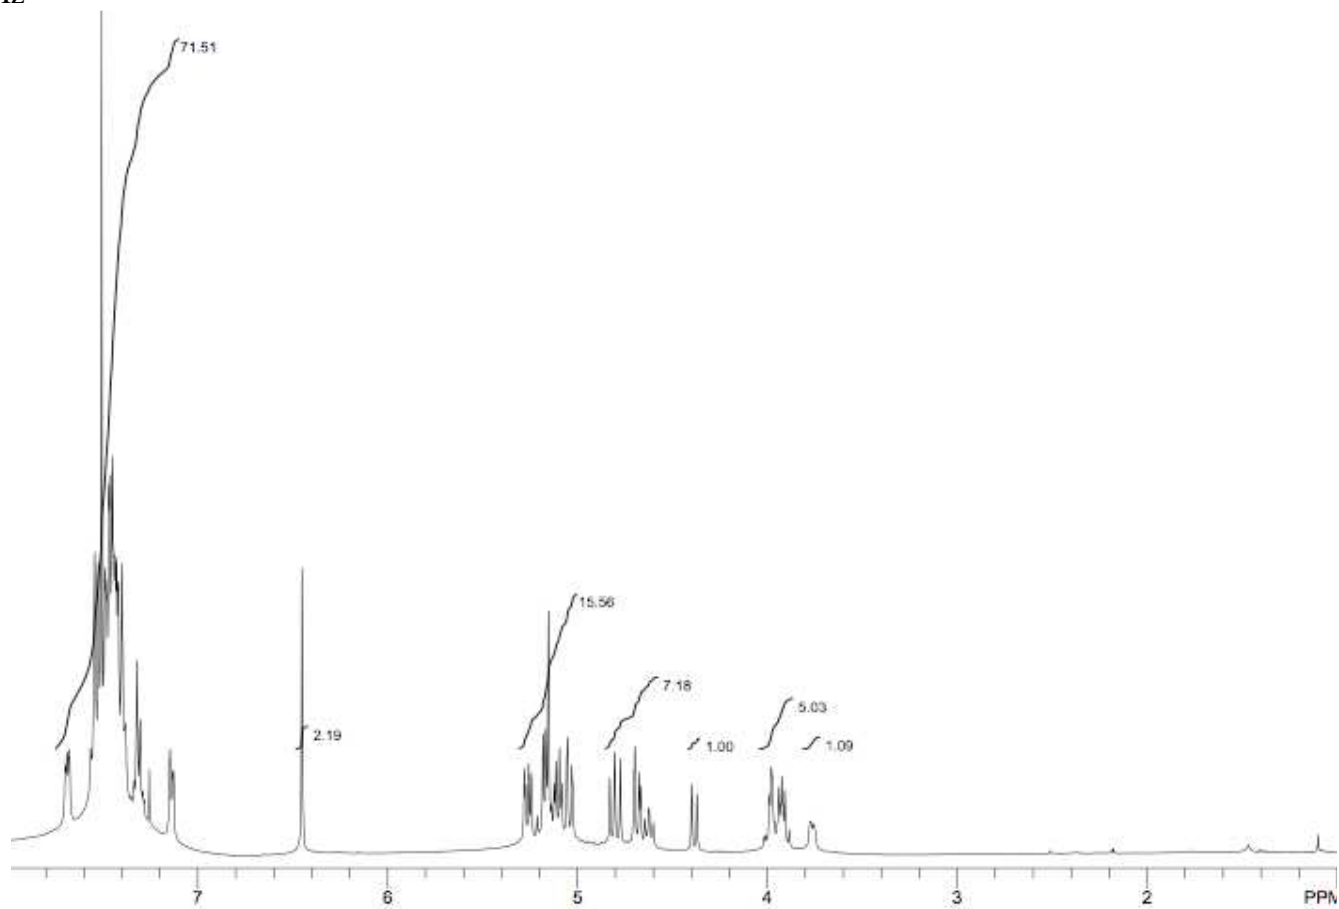

CDCl<sub>3</sub>, 100MHz

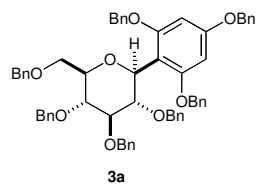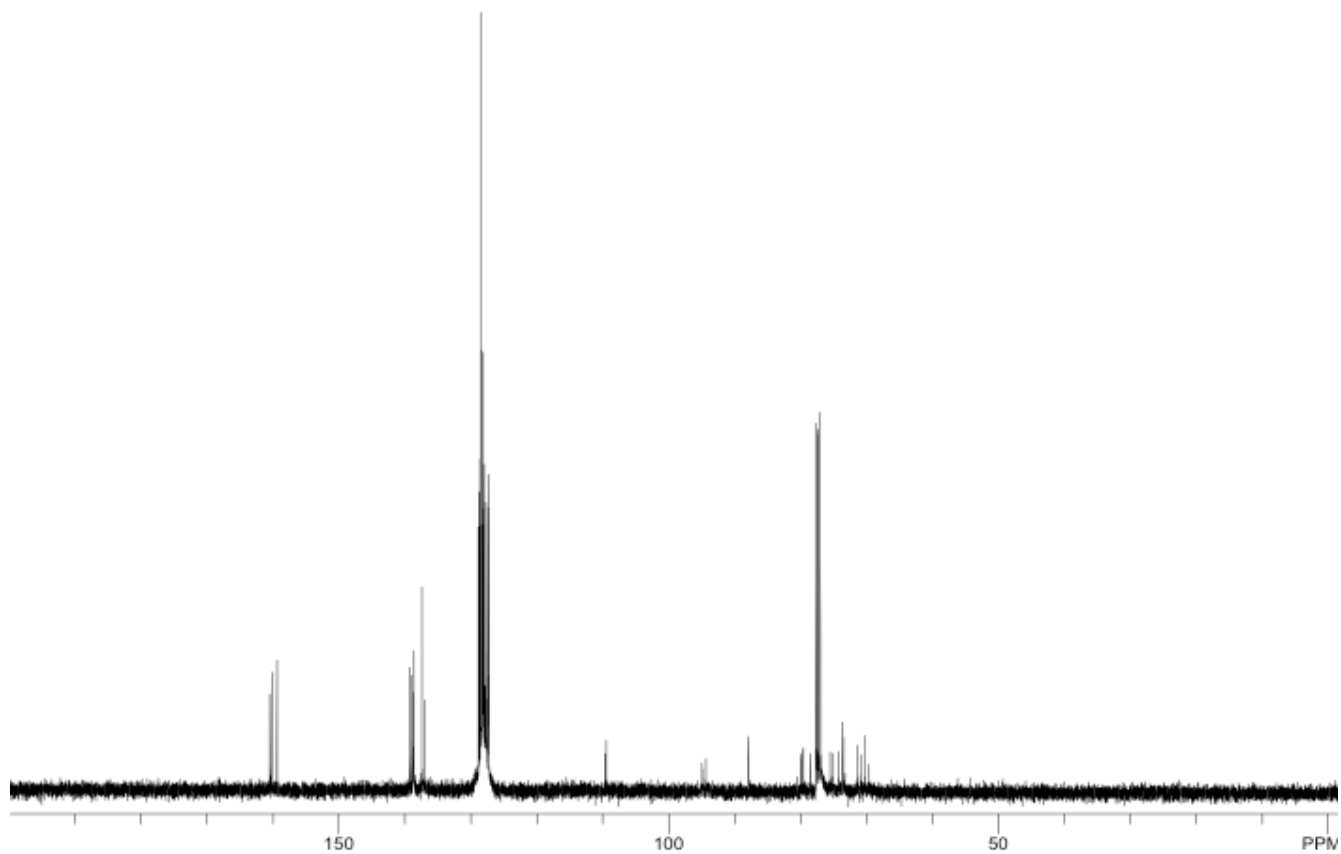

CDCl<sub>3</sub>, 400MHz

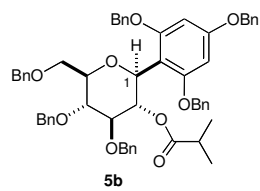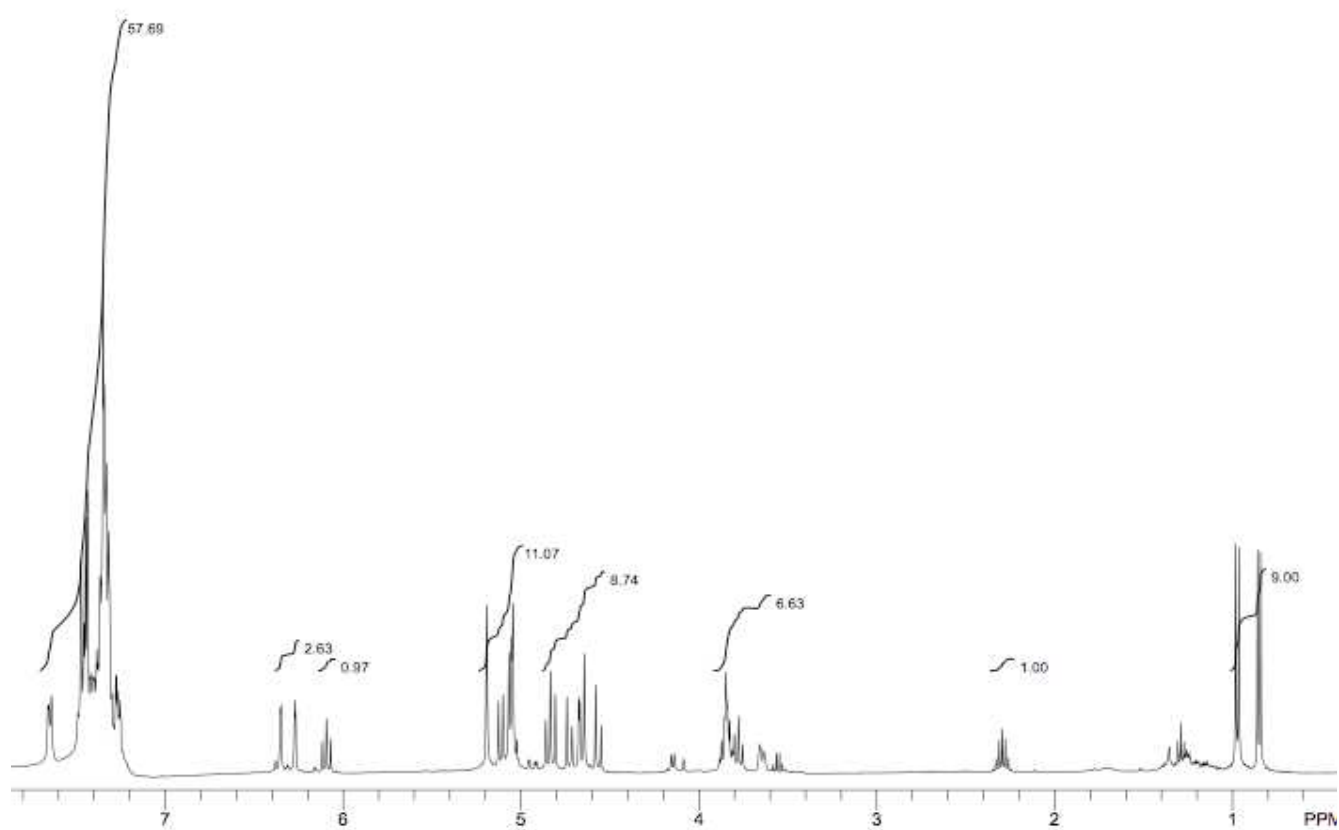

CDCl<sub>3</sub>, 100MHz

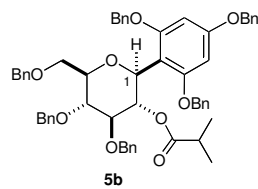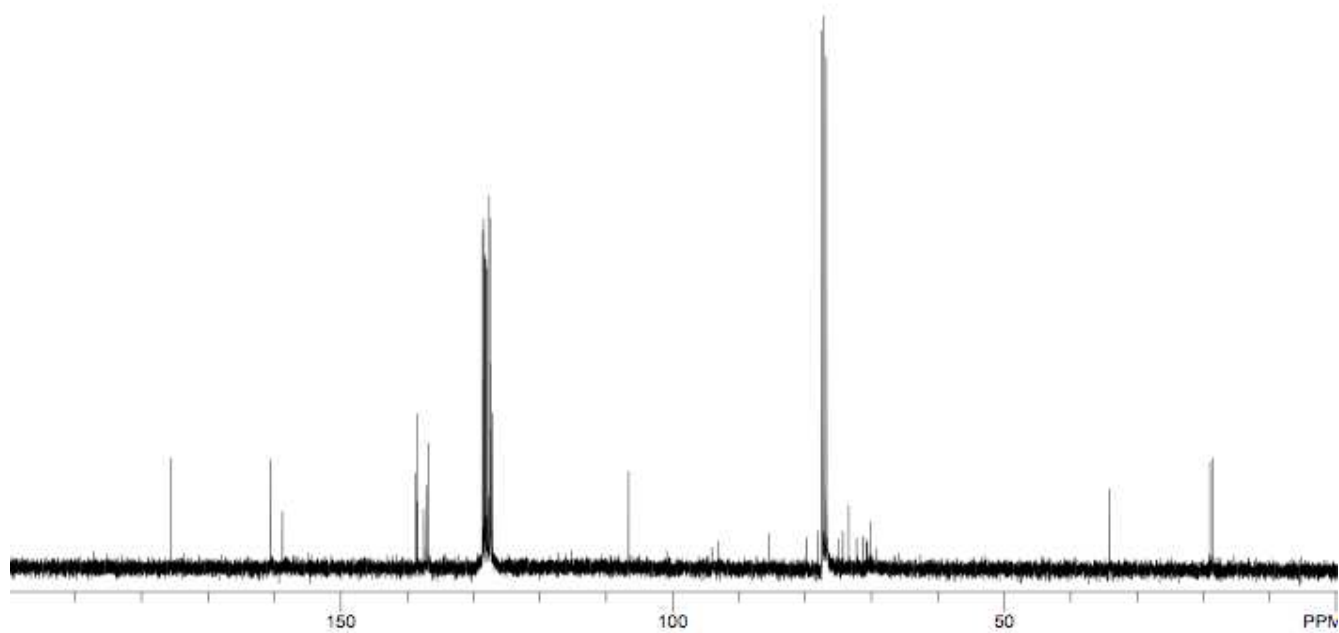



CDCl<sub>3</sub>, 400MHz

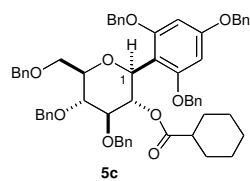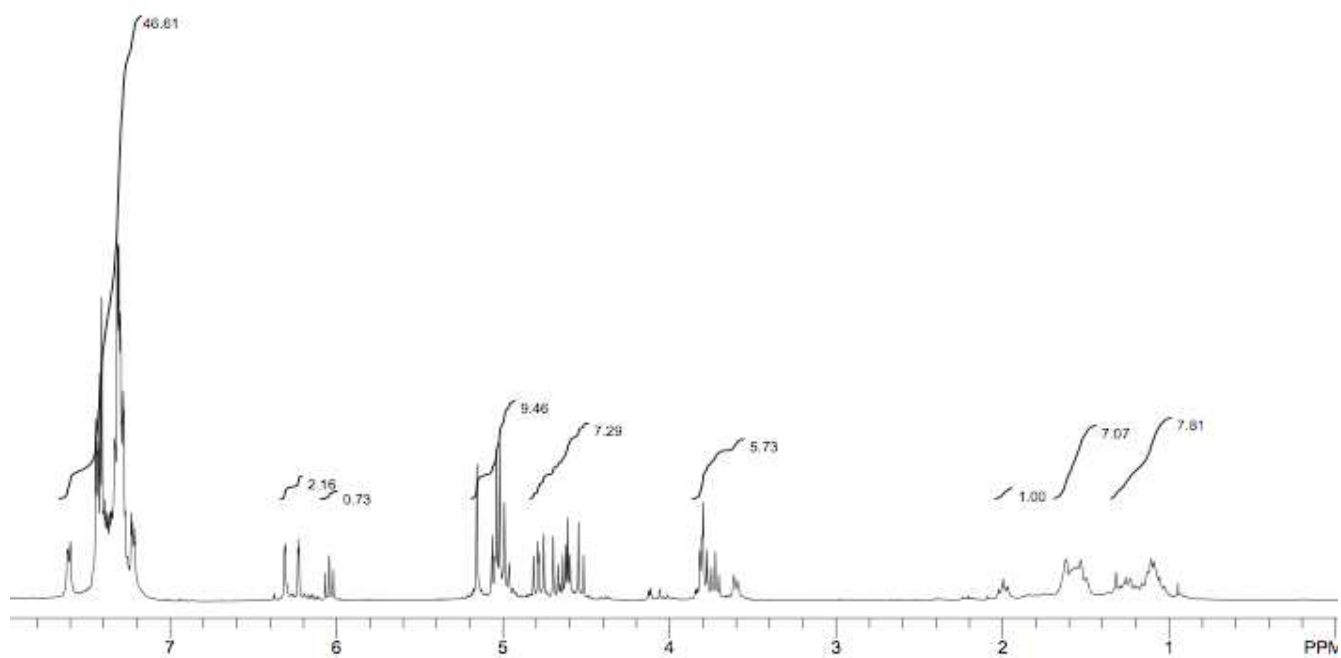

CDCl<sub>3</sub>, 100MHz

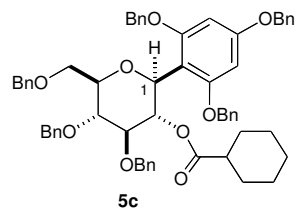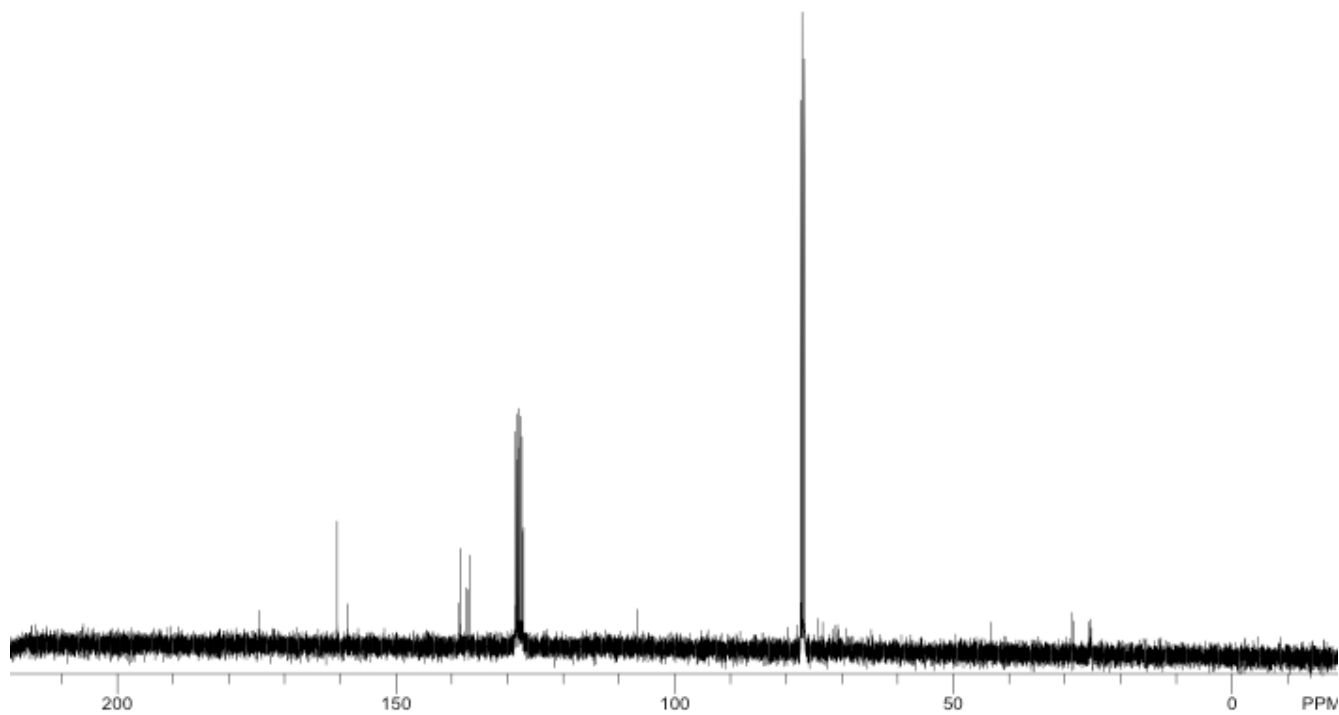

CDCl<sub>3</sub>, 400MHz

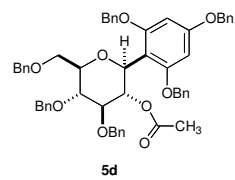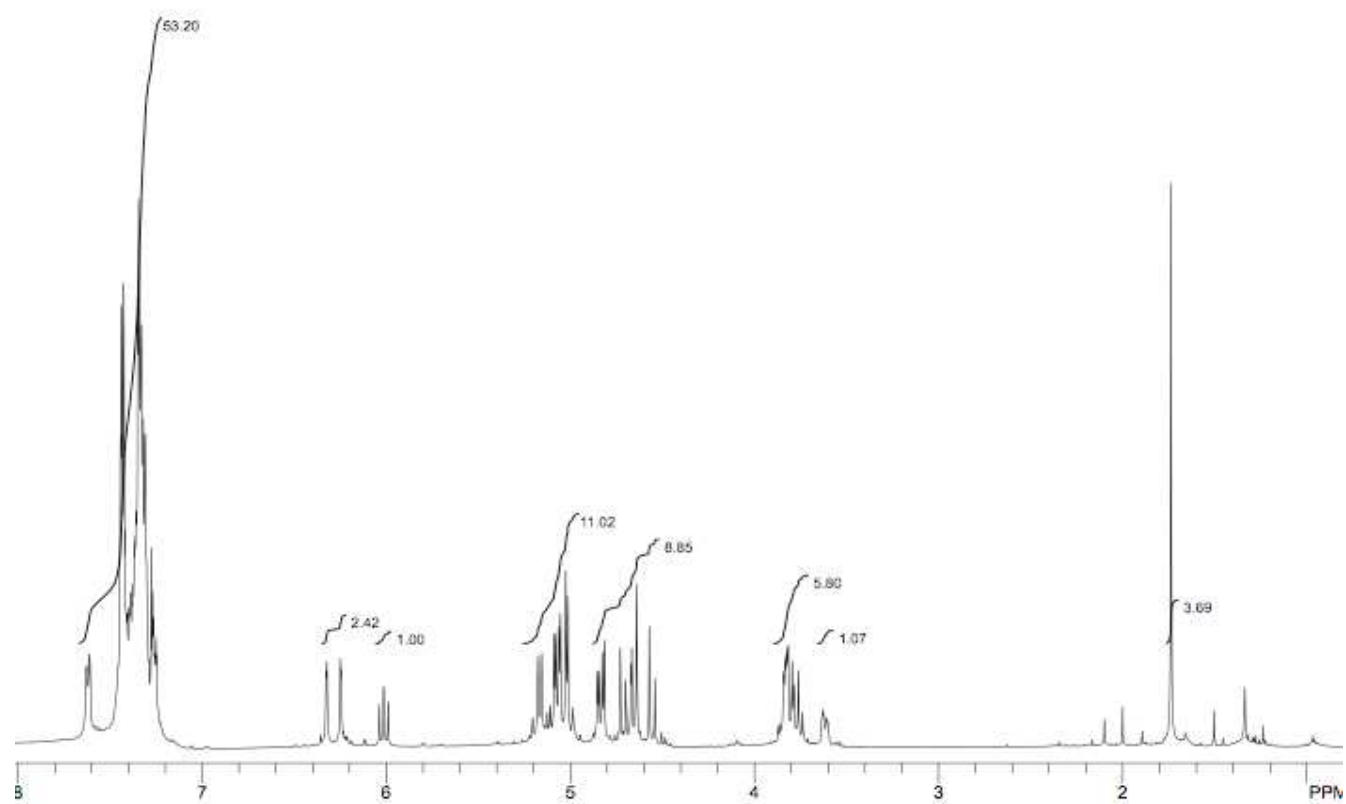

CDCl<sub>3</sub>, 100MHz

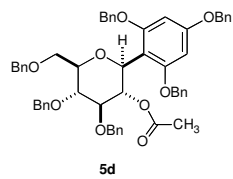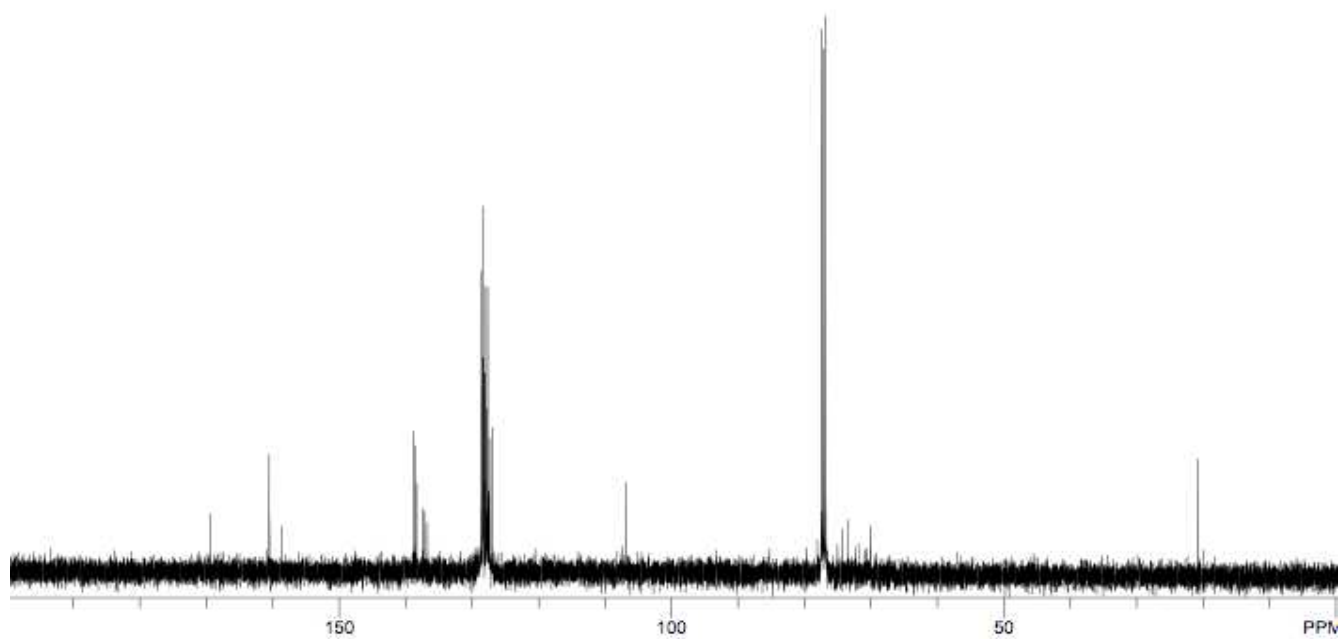

CDCl<sub>3</sub>, 400MHz

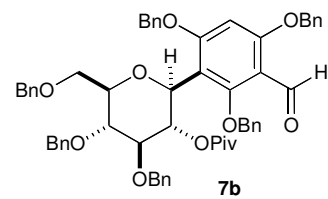

(10:1 mixture of  $\beta$ : $\alpha$  anomers)

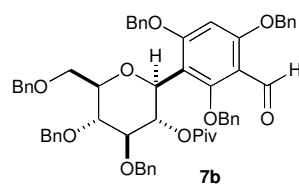

30

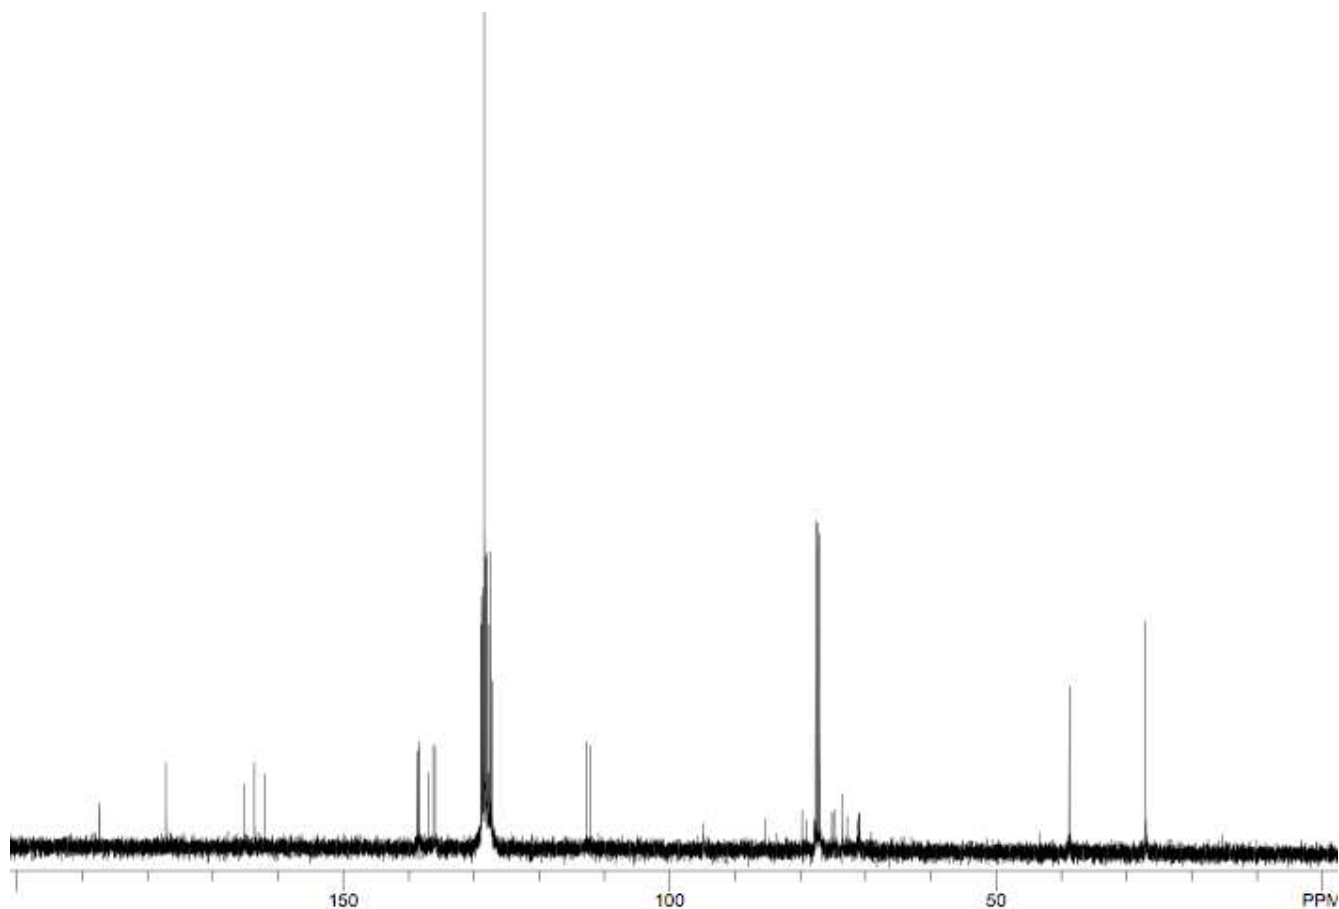

CDCl<sub>3</sub>, 400MHz

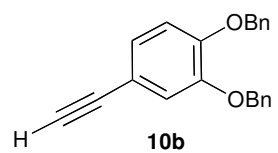

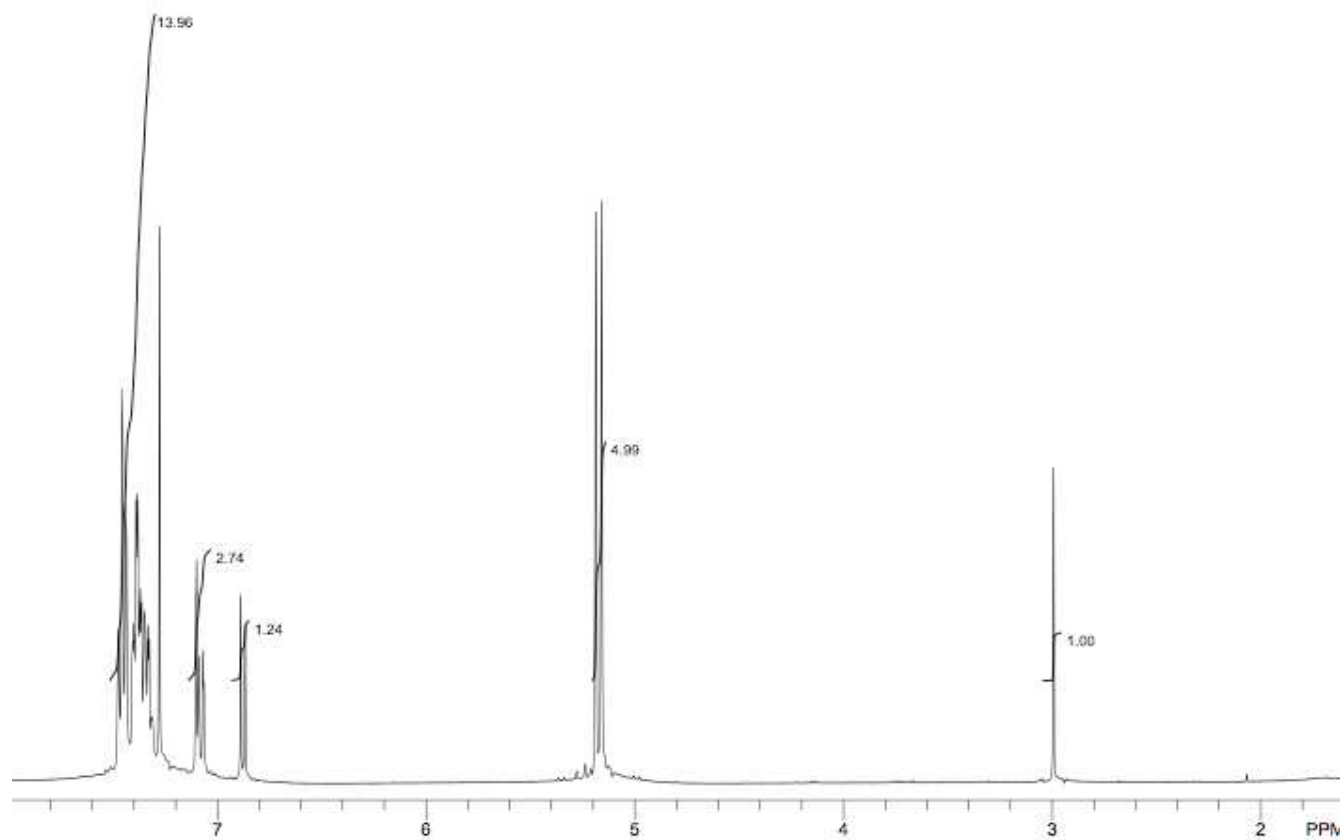

CDCl<sub>3</sub>, 100MHz

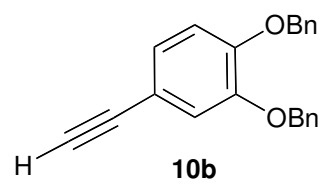



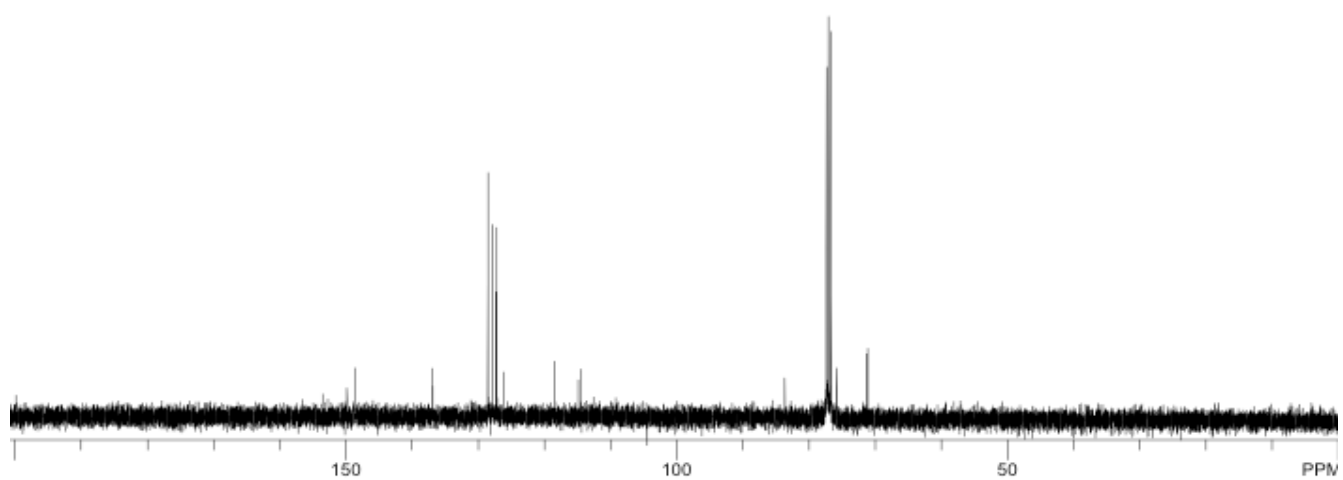

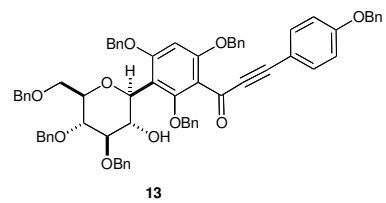

CDCl<sub>3</sub>, 400MHz

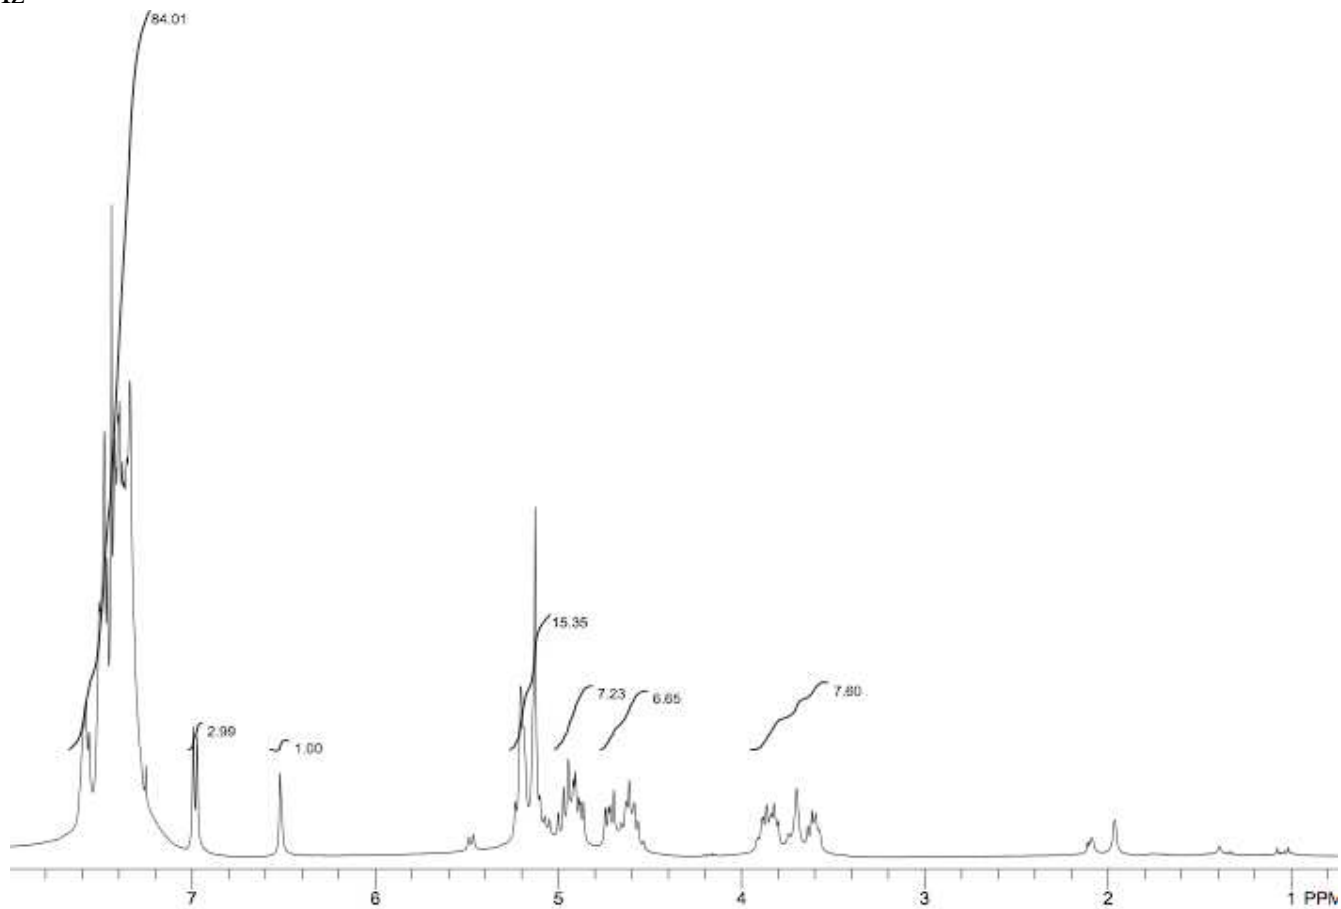

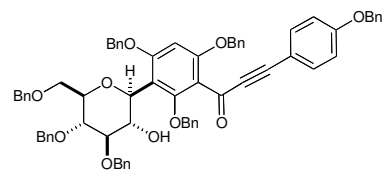

13

CDCl<sub>3</sub>, 100MHz

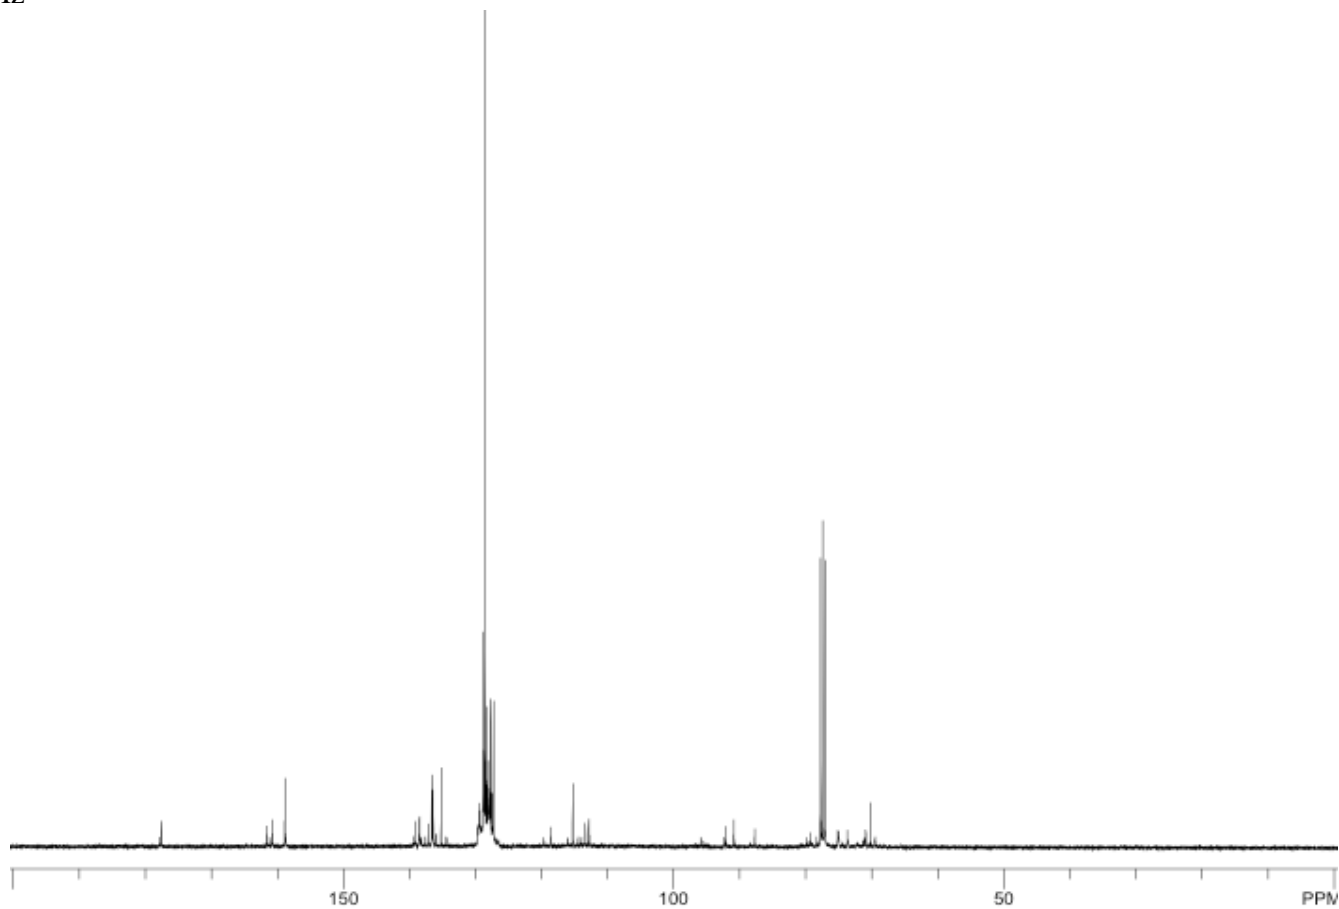

CDCl<sub>3</sub>, 400MHz

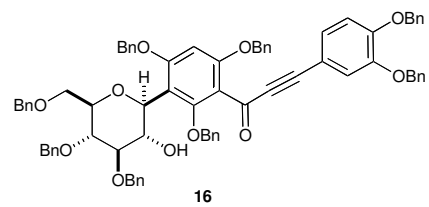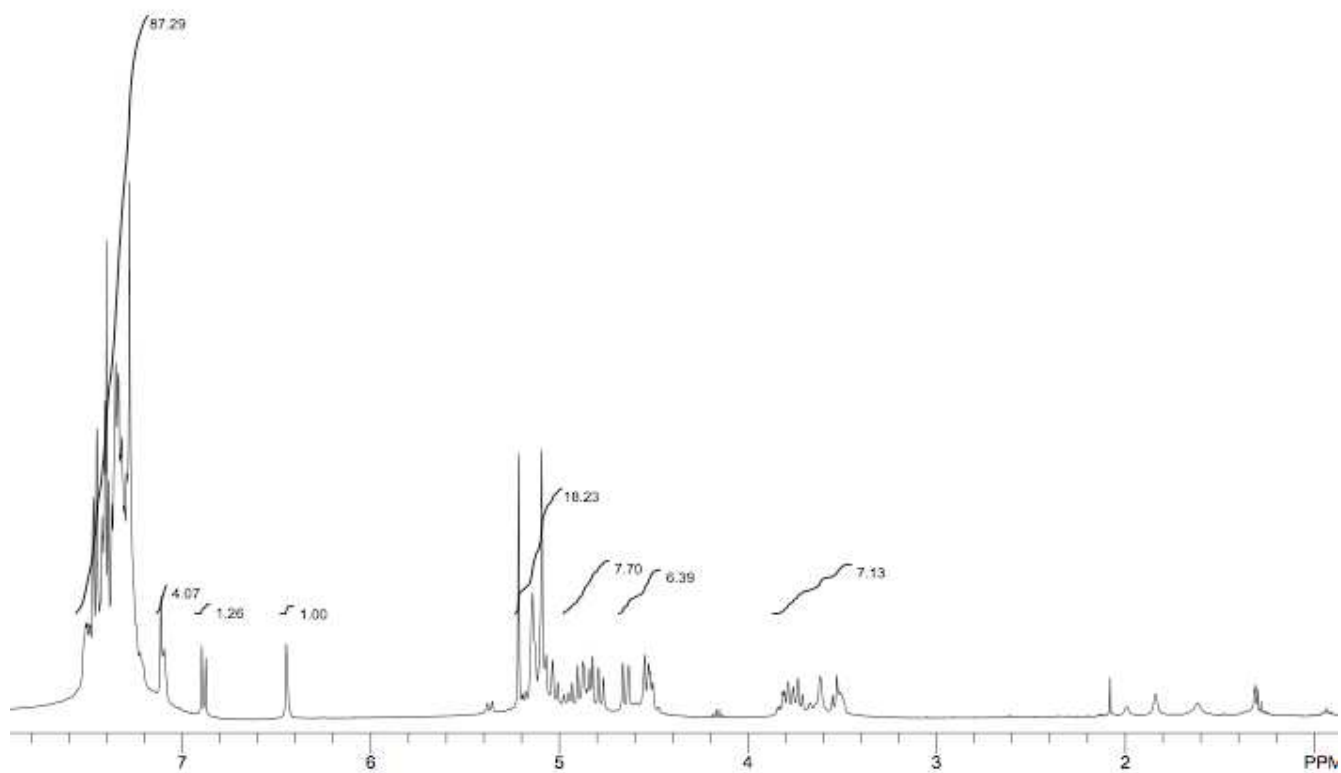

CDCl<sub>3</sub>, 100MHz

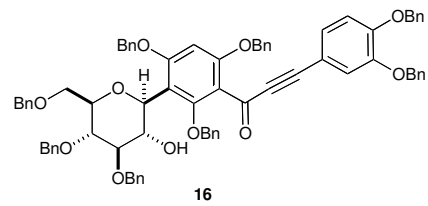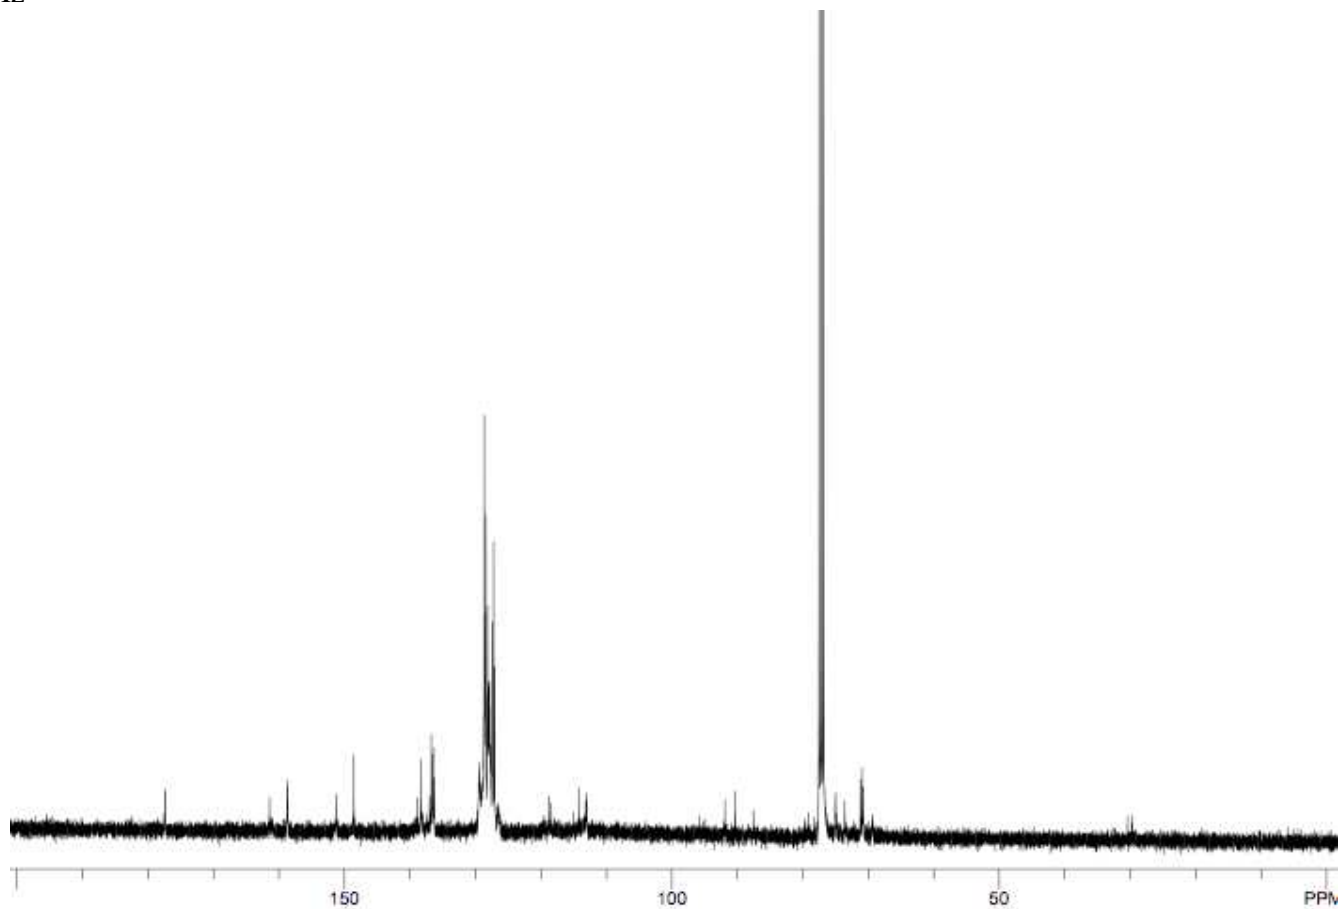

DMSO-d6, 400MHz

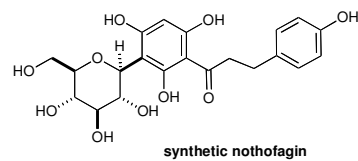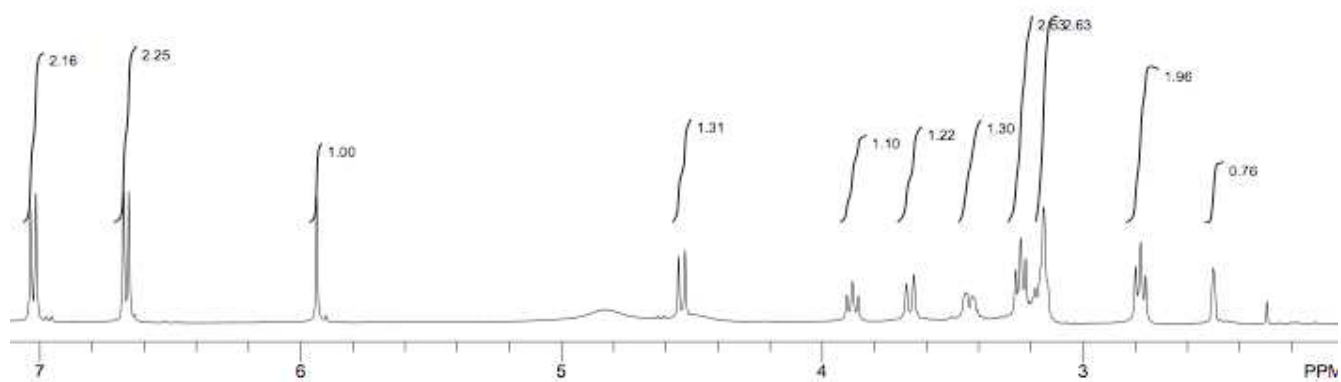

DMSO-d6, 100MHz

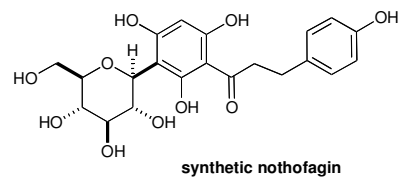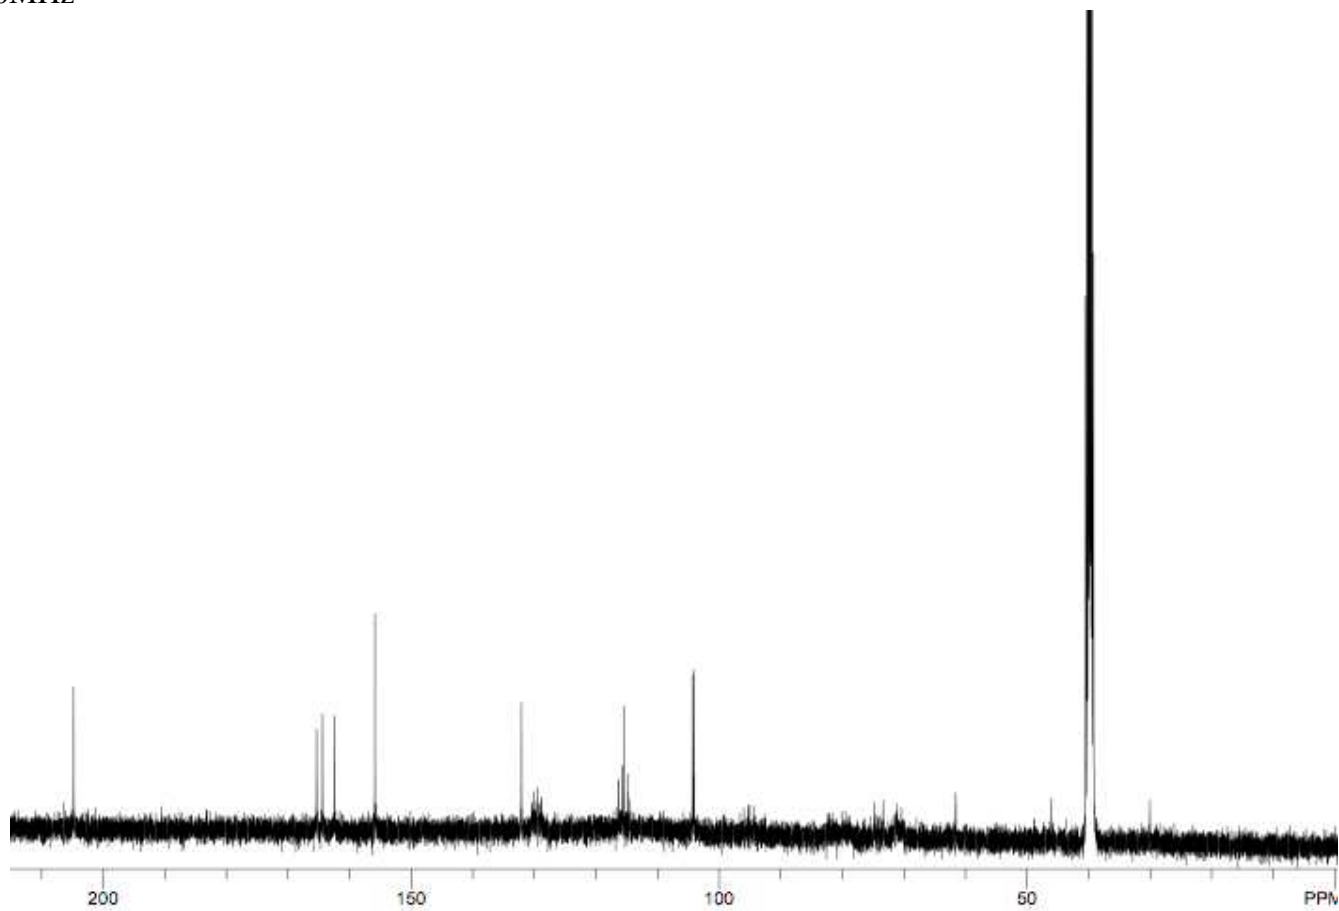

DMSO-d<sub>6</sub>, 400MHz

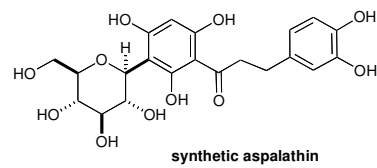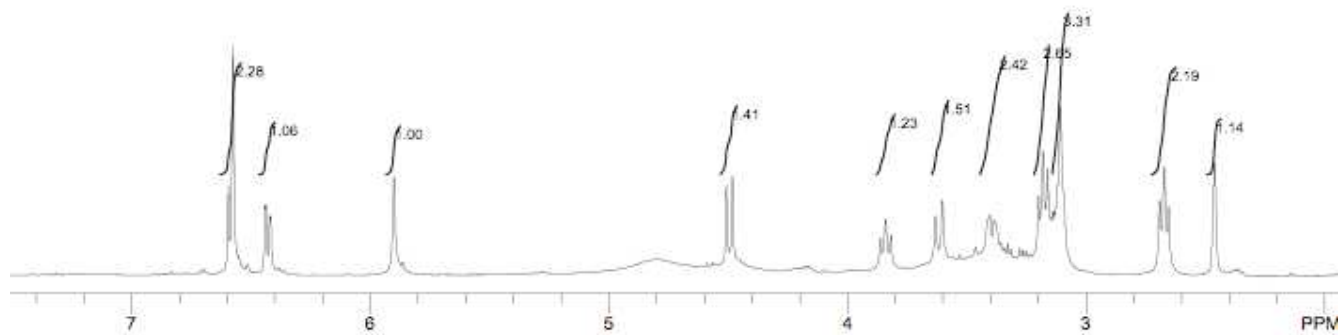



DMSO-d<sub>6</sub>, 100MHz

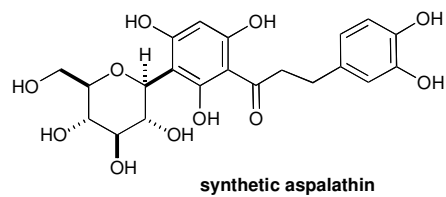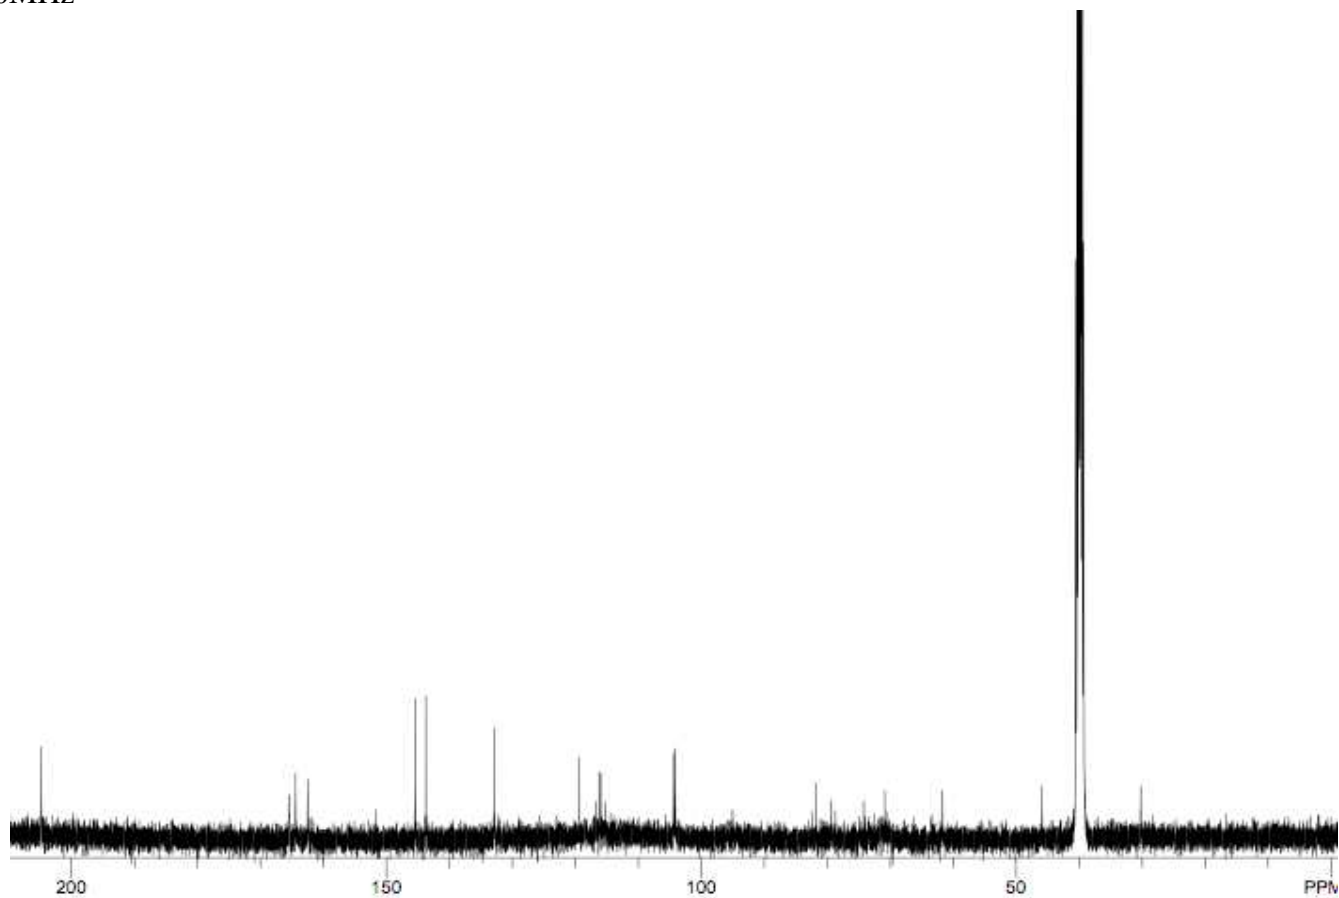

Supplement: Supplementary file 1 [file 4474921]
